1 **Extracellular Vesicle exchange is favored by cell proximity.**

2 Federico Colombo<sup>1,2</sup>, Erienne Grace Norton<sup>1,2,3</sup>, Emanuele Cocucci<sup>1,2,4</sup>

3 <sup>1</sup>College of Pharmacy, The Ohio State University, Columbus, OH 43210, USA

4 <sup>2</sup>Comprehensive Cancer Center, The Ohio State University, Columbus, OH 43210, USA

5 <sup>3</sup> Current address: St. Jude Children's Research Hospital, Memphis, TN 38105, USA.

6

7 <sup>4</sup> To whom correspondence should be addressed.

8 Emanuele Cocucci, MD PhD

9 Assistant Professor, Division of Pharmaceutics

10 College of Pharmacy and Comprehensive Cancer Center

11 The Ohio State University

12 Biomedical Research Tower, Room 412

13 460 West 12th Avenue

14 Columbus, OH 43210

15 Orcid ID: <https://orcid.org/0000-0002-0088-9845>

16 Phone: (614) 366-4412

17 Email: [cocucci.1@osu.edu](mailto:cocucci.1@osu.edu)

18 **Extracellular vesicles (EVs) are biological nanovectors that retain information of the cell of origin**  
19 **and convey signals to recipient cells. Therefore, EVs are ideal platforms for the development of**  
20 **diagnostic tools and of bio-inspired drug delivery technologies. However, the dynamics of EV**  
21 **distribution in physiological conditions are still underexplored. Using an elegant series of**  
22 **experiments, including quantitative assays to define EV transfer and five dimension live cell**  
23 **imaging, we observe the release and internalization of EVs in real time and we demonstrate that**  
24 **EVs are mainly exchanged at the cell-cell interface. These observations prompt paradigm shifting**  
25 **consequences: first, EVs are mostly short-range intercellular vectors that influence adjacent**  
26 **cells; second, our data explain why increases in the internal pressure and permeability of the**  
27 **parenchyma, two hallmarks of inflammation and cancer, can facilitate EV escape from the**  
28 **damaged tissue. In conclusion, we provide experimental evidence supporting why EVs have great**  
29 **potential for the implementation of specific and sensitive liquid biopsy tests.**

30 Extracellular vesicles (EVs) are membrane-delimited structures released by any cell that can navigate  
31 bodily fluids<sup>1</sup>. EVs contain molecules such as proteins and nucleic acids that have stimulatory potential  
32 and can influence multiple cellular functions, including cell motility and development, as well as contribute  
33 to disease progression<sup>2-4</sup>. Since the content of EVs is representative of their cell of origin, EVs released  
34 by diseased tissues carry cargoes that mirror the overall complexity of the underlying pathological  
35 process, representing a potential source of information for diagnostic and prognostic clinical use in  
36 cancer<sup>5-7</sup>, neurodegenerative diseases<sup>8-10</sup>, or other conditions for which biopsies are the standard of care  
37 but frequent repetition of the procedure is impractical due to invasiveness and cost<sup>11</sup>. However, the  
38 dynamics of EV distribution are poorly understood. For example, experimental and clinical cancer models  
39 show an increase of circulating EVs, but the biological basis for this observation is not yet explained<sup>12</sup>.  
40 Therefore shedding light on the biophysical rules that define the dynamics of EV exchange can provide  
41 essential information to exploit EVs as biomarkers and nanovectors for drug delivery. Since tissues are  
42 formed by densely packed arrays of cells, we hypothesized that cell density has a key role in controlling  
43 EV distribution by influencing EV release and/or diffusion.

44 To investigate the role of cell density in EV release, we plated SUM159-PT (SUM159) cells, a model of  
45 metastatic breast cancer<sup>13</sup>, at increasing concentrations. To avoid the confounding contribution of EVs  
46 derived from fetal bovine serum (FBS), we cultured the cells in Opti-MEM, which sustains cell growth in  
47 the absence of serum. After 24 hours, we collected the supernatants and processed them for  
48 Nanoparticle Tracking Analysis (NTA) to quantify EV concentration<sup>14</sup>. While the absolute number of EVs  
49 retrieved in the supernatant increased with increasing cell density, the number of EVs released per cell  
50 decreased significantly (Fig 1a). Increasing cell density did not significantly modify the size of the EVs,  
51 which maintained a mode diameter distribution between 129 and 152 nm (Figure 1b,c). We also observed  
52 the typical cup shape of EVs<sup>15</sup> when the samples were subjected to transmission electron microscopy  
53 analysis (Figure 1d,e). Slot-blot analysis of the recovered media showed that the signals of the  
54 tetraspanins CD9 and CD63, well-known EV markers, followed a similar trend (Figure S1a-c). Since CD9

55 is a marker of ectosomes and CD63 of exosomes<sup>16,17</sup>, this result suggests that either EVs budding from  
56 the plasma membrane or EVs released upon multivesicular body fusion are influenced by cell density. A  
57 possible explanation is that sparse cells expose more surface to the extracellular space for EV budding  
58 than densely packed cells (Figure 1f).

59 Nevertheless, the experiments presented so far could not discriminate between alternatives: increase in  
60 cell density can either prevent EV release, or promote EV internalization and degradation in neighboring  
61 cells<sup>18–21</sup>. To test this, we developed an unbiased approach to quantify the fraction of cells that  
62 accumulate EVs. The experiment was based on a co-culture of EV-donor and EV-recipient cells. EV-  
63 donor cells were transfected with the tetraspanin CD9 conjugated at its N-terminal with the monomeric  
64 fluorescent protein Emerald (CD9-Emerald), an improved version of EGFP<sup>22</sup>. CD9-Emerald distributed  
65 on the cell surface (Fig. S1d) and its over-expression did not influence EV release either quantitatively or  
66 qualitatively (Fig. S1e-g). The EV-recipient cells were transfected with nuclear-tagBFP (n-BFP). Co-  
67 culture experiments were set up using both SUM159 and HeLa cells, two models that have been used  
68 extensively in EV and membrane trafficking studies<sup>17,23,24</sup>. One day after transfection, respective donor  
69 and recipient cells were plated in the same well (Fig. 2a). We reasoned that the inhibition of vacuolar H<sup>+</sup>-  
70 ATPase by Bafilomycin A1 (Bafilomycin) could define whether internalized EVs are degraded in  
71 lysosomes. For this reason, we added either 50 nM Bafilomycin, a concentration that had non-toxic  
72 effects on our cell models (Fig. S2a), or its solvent (DMSO) to the culture dishes. The following day, we  
73 resuspended and analyzed the cells by flow cytometry. Cells retaining n-BFP and CD9-Emerald signal  
74 accounted for the fraction of n-BFP cells that engulfed CD9-Emerald EVs. In some experiments, the cells  
75 were sorted and plated on coverslips to confirm by confocal microscopy that EVs labelled by CD9-  
76 Emerald were indeed internalized by the recipient cells (Fig. 2b). The fraction of n-BFP cells that engulfed  
77 CD9-Emerald labelled EVs significantly increased in both SUM159 and HeLa cells upon exposure to  
78 Bafilomycin (Fig. 2c-e). We confirmed our results by confocal microscopy. In this set of experiments,  
79 recipient cells were labelled with clathrin-light chain mRuby (Clathrin-mRuby)<sup>25</sup> to clearly visualize their  
80 surface (Fig. 2f,g). Upon Bafilomycin treatment, CD9-Emerald EVs accumulated in the cytosolic space  
81 of the recipient cells (Fig. 2 h,i). An increase in EV release upon Bafilomycin treatment<sup>26</sup> may have  
82 partially contributed to the accumulation of EVs in the endocytic pathway. Thus, to assess whether  
83 Bafilomycin enhanced EV release in our cell models, we quantified the number of EVs released by cells  
84 cultured in Opti-Mem media in the presence of the drug or its solvent by NTA. We detected ~3 times  
85 more EVs upon Bafilomycin administration (Figure S2b). When the supernatants of cells treated or not  
86 with Bafilomycin were probed for CD63 and CD9 by slot blot (Fig. S2c), we observed that while both  
87 CD63 and CD9 signals increased, the former was significantly more than the latter (Fig S2d). A possible  
88 explanation is that Bafilomycin promotes the accumulation of intraluminal vesicles by impairing lysosome  
89 function, thereby enhancing the release of exosomes, which are typically enriched in CD63<sup>27</sup>.  
90 Alternatively, the increase of CD9<sup>+</sup> EVs in the supernatant of cells exposed to Bafilomycin may be due to  
91 the increased recycling of internalized ectosomes that would otherwise be degraded. Since both the total

92 number of EVs and the fraction of cells that engulfed EVs increased upon Bafilomycin treatment, we  
93 concluded that EV release is not hindered by cell-to-cell contact. Instead, increasing cell density results  
94 in more EVs being internalized at the cell-cell interface and degraded in the endo-lysosomal network of  
95 recipient cells.

96 We reasoned that co-culture experiments could be extended to the visualization of EV exchange in real  
97 time. To this end, we used lattice light sheet microscopy (LLSM) since image acquisition is faster and  
98 less phototoxic than with confocal microscopes. LLSM permits visualization of the entire cell volume while  
99 retaining single object/single molecule resolution, resulting in one of the most effective approaches to  
100 study cell biology events in five dimensions<sup>24,28,29</sup>. SUM159 donor cells were transfected with CD9-Halo  
101 and labelled with 5 nM of photostable JF549-Halo dye (Fig. S3a)<sup>24,30</sup>. As expected, CD9-Halo labelled  
102 the cell surface including filopodia and membrane ruffles (Fig. S3b). In addition, when SUM159-CD9-  
103 Halo cells were co-cultured with cells expressing CD63-EGFP, CD9-Halo-EVs accumulated in endo-  
104 lysosomal structures labelled by CD63 (Fig S3c), recapitulating our previous findings. We used SUM159  
105 cells gene-edited to express the subunit *mu* of the adaptor protein complex AP2 labelled with EGFP  
106 (AP2M1-EGFP), a well-established marker of clathrin mediated endocytosis<sup>31</sup>, as recipient cells. While it  
107 is well known that clathrin coated vesicle formation takes roughly 60 seconds and that a frequency of  
108 volume acquisition of 0.3 Hz is sufficient to detect the dynamics of clathrin mediated endocytosis<sup>24,31</sup>, the  
109 time course of EV release and uptake in real time is poorly investigated. Since a particle of 100 nm in  
110 diameter moves at  $\sim 10 \mu\text{m}^2/\text{s}$  when freely diffusing in medium<sup>32</sup>, we reasoned that to successfully track  
111 single EVs from release to uptake, it was necessary to focus on the cell-cell interface. At this location,  
112 EVs entrapped between contiguous cells would be subjected to a constrained diffusion. Although we  
113 collected 23 movies ranging from 15 to 40 minutes of acquisition (a total of 12 hours of imaging), we only  
114 identified 10 events that unambiguously corresponded to EVs released from donor cells that were  
115 internalized in recipient cells (Fig 3a,b and 3d,e; Movie 1 and 2). At least two reasons explain why the  
116 EV internalizations were rarely detected: first, because a cell releases roughly 3,400 EVs in 24 hours  
117 (see Fig 1a), which corresponds to only  $\sim 3$  EVs per minute; second, because we were restricting our  
118 studies to a subfraction of EVs by solely monitoring vesicles labelled with CD9. Despite these limitations,  
119 we could observe EV exchange in real time. EVs either budded from the cell surface or were released  
120 upon the sudden rupture of the tips of filopodia, strengthening the general assumption that CD9 is a  
121 marker of ectosomes. In addition, filopodia can undergo additional scission events after being released,  
122 producing smaller EVs (Movie 3). Noteworthy, the few EVs that were internalized did not colocalize with  
123 AP2-EGFP at any point in time, while other CD9-EVs that were entrapped in clathrin coated vesicles  
124 were never endocytosed (Fig. 3c). These results suggested that CD9-EVs are not internalized by clathrin-  
125 mediated endocytosis. To unequivocally confirm our observations, we used a HeLa cell model in which  
126 complete depletion of clathrin heavy chain could be obtained by activating a doxycycline-dependent  
127 shRNA system (Fig. 3f)<sup>33</sup>, thereby inhibiting clathrin-mediated endocytosis (Fig. 3g). HeLa cells depleted  
128 or not of clathrin were transfected with n-BFP and co-cultured with CD9-Emerald HeLa cells. Flow

129 cytomtery analysis showed that clathrin depletion did not impair the endocytosis of CD9<sup>+</sup> EVs (Fig. 3h,i),  
130 strengthening our conclusions.

131 If it is true that EVs are mainly exchanged at the cell-cell interface, high cell density may maximize the  
132 number of cells that internalize EVs. To explore this possibility, we seeded co-cultures of HeLa cells  
133 expressing either CD9-Emerald (EV-donor) or n-BFP (EV-recipient) at decreasing density. Cells were  
134 also exposed to Bafilomycin (as described previously) to maximize the detection of EV exchange. Then,  
135 each co-culture was analyzed by flow cytometry to assess the fraction of n-BFP cells that internalized  
136 EVs. As expected, cells at confluence had the largest amount of double-positive cells while the fraction  
137 was significantly reduced at lower densities (Fig. 4a,b). Since low cell density may result in an inefficient  
138 EV exchange due to the decrease in the absolute number of the EVs released in the extracellular space,  
139 we set up a compartmentalized co-culture system where the same number of EV donor and recipient  
140 cells were seeded in either a *Close* or *Far* configuration. To achieve this, we printed *ad hoc* cell culture  
141 rings in a biocompatible material using a stereolithography 3D printer (Fig. S4a,b). The rings were used  
142 to plate the cells in a confined space (Fig. 4c; S4c). After cell spreading occurred, the rings were removed  
143 and media containing Bafilomycin was added to fill the dish (Fig. S4d). The following day, the cells were  
144 detached and analyzed by flow cytometry to quantify the amount of EV transfer. When cells were plated  
145 in the *Close* configuration, the fraction of double-positive cells was significantly higher in comparison with  
146 the cells plated in the *Far* configuration (Fig. 4d,e). These results revealed that cell-to-cell proximity has  
147 a significant impact on the amount of intercellular transfer of EVs, further confirming that EVs are  
148 exchanged locally.

149 However, the motion of bodily fluids may propel EVs to reach anatomical districts far from the site of  
150 origin. To simulate this event, CD9-Emerald and n-BFP<sup>+</sup> HeLa cells seeded in the *Far* configuration were  
151 incubated either motionless or under continuous agitation in the presence of Bafilomycin. A co-culture of  
152 CD9-Emerald and n-BFP HeLa cells plated in the *Close* configuration was used as a reference (Fig. 4c;  
153 S4c). Interestingly, when cells were analyzed by flow cytometry, there was no significant difference in the  
154 fraction of cells that internalized EVs between the two conditions when seeded in the *Far* configuration  
155 (Fig. S4e,f). Conversely, the fraction of internalized EVs in the cells plated in the *Close* configuration was  
156 significantly higher when compared with both samples plated in the *Far* configuration (Fig. S4f). These  
157 results confirmed that EVs are mainly exchanged at the cell-cell interface. These observations raise an  
158 additional question: how far can EVs travel between adjacent cells? To explore this, we plated CD9-Halo  
159 HeLa cells with HeLa cells loaded with Calcein AM in a ratio of 1:3,000 to ensure that donor cells would  
160 be surrounded by a monolayer of recipient cells (Fig. 4f). After 48 hours, the cells were imaged by  
161 confocal microscopy to capture images of the sparse donor cells (Fig 4g-j). We developed a segmentation  
162 protocol that identifies the donor cells and designs concentric regions of interest to measure the relative  
163 intensity of EV signal in function of the distance from the edges of the donor cells (Fig. 4k). Our results  
164 demonstrate that EV signal decays exponentially from the contours of the donor cell (Fig. 4l) with the

165 maximum being within the first 14  $\mu\text{m}$ , which roughly corresponds to the first layer of calcein-labelled  
166 recipient cells.

167 In conclusion, our results support a model where EVs are exchanged between adjacent cells and  
168 promptly degraded, suggesting that EVs are mainly confined within the tissue of origin (Fig. 4m). It may  
169 seem difficult to reconcile this observation with the role that EVs play as mediators of intercellular  
170 communication. However, it is important to consider that many of the effects that EVs elicit are short  
171 range communication in nature, such as the trophic support that EVs released by Schwann or glial cells  
172 can provide to damaged axons<sup>34</sup>, or EVs exchanged at the immune synapse<sup>35</sup>. Moreover, this  
173 communication can be regulated by ligands harbored on the EV surface that can stimulate cells by  
174 clustering signal receptors<sup>36,37</sup> and therefore act at the cell surface before being degraded in lysosomes.  
175 Although we did not detect EV fusion with recipient cells in our system, it is an event that can happen,  
176 albeit rarely<sup>23</sup>. Finally, when extrapolated to three dimensional tissues, our data predict that circulating  
177 EVs originate from cells exposed to the bloodstream. These could be endothelial and blood cells, or  
178 tissues with leaky vasculature such as the liver. In addition, our data predict that EVs can escape from  
179 tissues when permeability and intraparenchymal pressure increase. Since these are the typical events  
180 that characterize inflammation, which is a hallmark of chronic diseases including cancer, our data provide  
181 physiological evidence to support the use of EVs as effective and specific tools for the development of  
182 liquid biopsy approaches.

## 183 MATERIALS AND METHODS

184

### 185 Reagents

186 The human triple-negative breast cancer cell line SUM-159PT and the gene edited cell line AP2S1-EGFP  
187 (SUM-AP2-EGFP) were a kind gift of Dr. Tomas Kirchhausen (Harvard Medical School, Boston, MA)<sup>31</sup>;  
188 the human cervical cancer cell line HeLa and inducible knock down for clathrin (HeLa CLTC) were from  
189 Drs. Pier Paolo Di Fiore and Sara Sigismund (IEO, European Institute of Oncology, Milano)<sup>33</sup>. The  
190 mammalian expression vectors for Clathrin-mRuby, mEmerald-CD9, and mTagBFP-Nucleus-7 were  
191 generously provided by Dr. Michael Davidson (Addgene Plasmids: #55852, #54029 and #55265), while  
192 the one to express EGFP-CD63 was provided by Dr. Martin Hemler. JF549-Halo Tag ligand is a kind gift  
193 of Dr. Luke Lavis (Janeila Research Campus). The expression vectors were propagated in DH5-alpha *E.*  
194 *coli* (New England Biolabs) and plasmids purified using Plasmid Miniprep or Midiprep Kits (Qiagen) or a  
195 PureLink HiPure Plasmid Filter Midiprep Kit (Thermo Fisher Scientific). Primers were obtained from IDT  
196 (Integrated DNA Technologies). Primary antibodies against clathrin heavy chain (mouse monoclonal,  
197 610499, BD Biosciences), CD9 (mouse monoclonal, 2897163, EMD Millipore), and CD63 (mouse  
198 monoclonal 561925, eBiosciences) were used for Western blotting together with anti-mouse IgG antibody  
199 conjugated with horseradish peroxidase (goat-polyclonal, 5178-2504, Bio-Rad). Chemicals were  
200 purchased from Sigma-Aldrich unless specified otherwise.

201

### 202 Cell handling and transfection

203 Cell lines were cultured at 37°C and 5% CO<sub>2</sub>; SUM159 were grown in F12-Glutamax (Thermo Fisher  
204 Scientific) supplemented with 5% fetal bovine serum (FBS) (VWR), 100U/ml penicillin and streptomycin  
205 (Thermo Fisher Scientific), 1 µg/ml hydrocortisone (H-4001; Sigma-Aldrich), 5 µg/ml insulin (128-100;  
206 Cell Applications), and 10 mM 4-(2-hydroxyethyl)-1-piperazine-ethane-sulfonic acid (HEPES), pH  
207 7.4. HeLa cells were grown in DMEM-high glucose supplemented with 10% FBS, 100U/ml penicillin and  
208 streptomycin, and 1% Glutamax (Gibco). To induce clathrin knock down, HeLa CLTC cells were cultured  
209 for 1 week in DMEM-high glucose supplemented with 10% Tetracycline-free FBS (Thermo Fisher),  
210 100U/ml penicillin and streptomycin, 1% Glutamax (Gibco), and 0.5 µg/ml doxycycline (Sigma-Aldrich).  
211 Cells were resuspended to be propagated or subjected to other experimental procedures by exposure to  
212 0.25% trypsin-EDTA (Thermo Fisher Scientific) for 3 minutes at 37°C, followed by a wash in 10 ml  
213 complete media and centrifugation at 1,000 rpm for 5 minutes. Cells were counted and plated as needed.  
214 Cell culture flasks and multi well plates were purchased from Greiner Bio-One.  
215 For transient transfections, 4 × 10<sup>5</sup> cells were plated in one well of a 6-well plate in complete medium.  
216 The following day 3 µl of Mirus TransIT 2020 reagent (Mirus Bio, Madison, WI) and 1 µg of plasmid were  
217 combined in 250 µl Opti-MEM (Thermo Fisher Scientific). After 30 minutes the mixture was added  
218 dropwise to the cells. Expression of Clathrin-mRuby, CD9-Emerald, nuclear-BFP, CD9-Halo, and CD63-  
219 GFP were obtained by transient transfection. To obtain SUM159 cells stably expressing CD9-Halo, the  
220 transiently transfected cells were expanded in T75 flasks in the presence of the antibiotic G418 (800

221 µg/ml for 15 days), and further enriched by two rounds of cell sorting and expansion over the course of  
222 three weeks.

223

#### 224 **Plasmid assembly**

225 The mammalian expression vector encoding for CD9-Halo was developed starting from the mEmerald-  
226 CD9 vector and a previously developed CALM-Halo construct<sup>24</sup>. Emerald was substituted with HaloTag  
227 using an approach based on isothermal assembly<sup>38</sup>. Briefly, two overlapping PCR products were  
228 generated using the high-fidelity DNA polymerase Q5 (New England Biolabs): one was the linearized  
229 recipient CD9 plasmid; the second was the HaloTag insert. Primers to generate the CD9 linearized  
230 plasmid were:

231 FW: 5'-cgagatttccggcggcagcggaggCCGGTCAAAGGAGGCACC-3'

232 RW: 5'- tttctgccatGGTGGCGACCGGTAGCGC-3'

233 Primers to amplify the HaloTag insert were:

234 FW: 5'-ggtcgcaccATGGCAGAAATCGGTA CTG-3'

235 RW: 5'-ctttgaccggccctccgctgccgccGGAAATCTCGAGCGTCGAC-3'

236 Upper-case characters in the primer sequences indicate the regions that anneal with the original  
237 constructs. The lower-case characters indicate additional bases inserted to provide matching sequences  
238 between the two amplified PCR products and a flexible linker (SGGSGG) between the HaloTag and the  
239 CD9 sequence. The PCR products were ligated using the NEBuilder HiFi DNA Assembly kit (New  
240 England Biolabs, Ipswich, MA) and transformed into competent DH5a *E. coli* (5-alpha Competent *E. coli*)  
241 following the protocol provided by the company (New England Biolabs, Ipswich, MA). For colony  
242 selection, bacteria were plated on Luria Broth agar plates supplemented with kanamycin (25µg/ml).  
243 Plasmids were extracted using the QIAprep Miniprep Kit (Qiagen, Hilden, Germany) or HiPure Plasmid  
244 Filter Midiprep Kit (Thermo Fisher Scientific, Waltham, MA) and sequenced to ensure that the correct  
245 modifications were in place.

246

#### 247 **Cell protein extraction and immunoblotting**

248 HeLa and HeLa CLTC cells grown on 6 well plates at 80% confluence were detached, washed three  
249 times in phosphate-buffered saline (PBS), and solubilized at 4°C in lysis buffer (50 mM Hepes pH 7.4,  
250 150 mM NaCl, 15 mM MgCl<sub>2</sub>, 1 mM EGTA, 10% glycerol, and 1% Triton X-100) supplemented with a  
251 protease inhibitor mixture (Roche). Nuclei were removed from the lysates by centrifugation (800 x g, 10  
252 minutes, 4 °C). Protein concentration was measured by Bicinchoninic acid (BCA) assay (Pierce).  
253 Samples were loaded in precast 4-20% gradient sodium dodecyl sulfate (SDS) polyacrylamide gels (Mini-  
254 PROTEAN TGX gels, Bio-Rad) and run at room temperature with 100 V (constant) before being  
255 transferred to polyvinylidene fluoride or nitrocellulose membranes using the Trans-Blot Turbo system  
256 (Bio-Rad) for 10 minutes at 2.5 A. Membranes were stained with Ponceau S solution then saturated in  
257 blocking buffer composed of Tris Buffer Saline (TBS) (150 mM NaCl and 50 mM Tris pH 7.4)  
258 supplemented with 5% nonfat dry milk and 0.05% Tween20. The membranes were then incubated for 1



259 hour with the appropriate primary antibodies diluted in blocking buffer (100 ng/ml). After three washes of  
260 5 minutes apiece in blocking buffer, the membranes were incubated with 1 µg/ml of secondary antibody  
261 for 1 hour. After extensive washes in Tris-buffered saline, the chemiluminescent signal was elicited by 5  
262 minute incubation with enhanced chemiluminescence substrate (ECL, Pierce, Thermo Fisher Scientific)  
263 and captured photographically on film (CL-XPosure, Thermo Fisher Scientific).

264

### 265 **Slot blot for EV protein detection**

266 SUM159PT cells were seeded in 6 well plates at increasing density. 24 hours post-plating, the cells were  
267 washed twice with PBS and maintained in Opti-MEM (1 ml/well). After 24 hours, the cell supernatants  
268 were collected and centrifuged at 5,000 x g for 10 minutes to remove floating cells and debris. The  
269 resulting supernatants were spotted on a nitrocellulose membrane (0.45 µm, Bio-Rad) using a slot blot  
270 apparatus. Briefly, pre-wet nitrocellulose in TBS solution (150 mM NaCl, 50 mM Tris pH 7.4) was inserted  
271 into a slot blot apparatus (Bio-Rad) connected to vacuum aspiration. The samples (200 µl each) were  
272 loaded into the slot-blot wells and dried out by vacuum. The process was repeated until the entire volume  
273 of each sample was loaded (1 ml each sample). An equal final volume of Opti-MEM was spotted on  
274 separate wells as negative control following the same procedure.

275 The nitrocellulose membrane was dried at RT for 2 hours, then saturated for 1 hour with blocking buffer  
276 (5% non-fat dry milk in TBS + 0.05% Tween20). The membrane was incubated overnight at 4°C with the  
277 primary antibodies diluted in blocking buffer (100 ng/ml). The day after, the membrane was washed three  
278 times with blocking buffer, incubated with anti-HRP secondary antibodies, and the signal developed with  
279 ECL reaction. Densitometric analysis were performed with ImageJ software (NIH).

280

### 281 **Nanoparticle Tracking Analysis (NTA)**

282 Cells were seeded in 6 well plates and grown in complete media. The day after cells were washed four  
283 times with HBSS (Gibco) and incubated in Opti-MEM (Gibco). After 24 hours, the cell supernatants were  
284 collected and centrifuged at 5,000 x g for 10 minutes to remove floating cells and debris. The resulting  
285 supernatants were collected and kept on ice before injection into the imaging chamber of NanoSight  
286 NS300 (Malvern Panalytical) by a syringe pump. Three videos of at least 30 seconds each were recorded  
287 for each sample. The instrument is equipped with a CMOS camera and controlled by NTA software  
288 (version 3.3). Camera shutter speed was set to 25 fps, camera gain to 250, and detection threshold to 5.  
289 Minimum expected particle size and minimum track length were set to automatic.

290

### 291 **Live cell confocal microscopy and data analysis**

292 After transfection, cells were detached, counted, and mixed in a Falcon tube. The cell mixture containing  
293 EV-donor (CD9-Emerald or CD9-Halo) and EV-recipient cells (Clathrin-mRuby, n-BFP, AP2-EGFP or  
294 CD63-GFP) were plated on a 6 well plate containing glass coverslips (#1.5; Warner Instruments, diameter  
295 25 mm) previously cleaned by sonication (Ultrasonic Cleaner Branson 1800, Branson) in ethanol and  
296 dried at 120°C. For SUM159 co-culture experiments, a total of 3 x 10<sup>5</sup> cells were seeded per well, while

297 for HeLa co-cultures  $6 \times 10^5$  cells per well were used. The day after seeding, cells were treated with 50  
298 nM Bafilomycin A1 or its solvent (DMSO) for 24 hours. When CD9-Halo<sup>+</sup> cells were used as EV donors,  
299 the co-cultures were incubated with JF549-HaloTag ligand<sup>39</sup> (5 nM) dissolved in complete media. After  
300 one hour of washes in cell media, the coverslips were moved into a metal chamber for live-cell imaging  
301 (Thermo Fisher Scientific) and acquired with a Nikon A1R scanning confocal microscope equipped with  
302 a temperature and CO<sub>2</sub>-controlled chamber. The microscope is controlled by the NIS Element software  
303 (Nikon). Image stacks were acquired using a Plan Apo 100X oil immersion lens (NA:1.45); planes were  
304 spaced 0.25  $\mu\text{m}$  along the z axis and pixel size was 0.25  $\mu\text{m}$ . ImageJ (NIH) was used to project the  
305 images across the z axis.

306 To define the concentration of JF549 Halo ligand that maximized CD9-Halo labelling while preventing  
307 nonspecific fluorescent signal, HeLa cells stably transfected with CD9-Halo were plated on 25 mm glass  
308 coverslips as described previously, exposed to increasing concentrations of JF549 (2.5-40 nM) for 1 hour,  
309 then extensively washed with media for an additional hour. Nuclei were labelled with 2  $\mu\text{g}/\text{ml}$  Hoechst  
310 (Thermo Fisher Scientific) for 10 minutes. Image stacks were acquired using a Plan Fluor 40X oil  
311 immersion lens (NA:1.3); planes were spaced 0.5  $\mu\text{m}$  along the z axis and pixel size was 0.62  $\mu\text{m}$ .

312 Five fields of view were acquired by live cell confocal microscopy for each coverslip in order to have >  
313 100 cells per condition. The images were analyzed using Cell Profiler<sup>40</sup>, which measured the intensity of  
314 each cell in the JF549 channel. A cell was defined by the software as the object comprised within the  
315 circle drawn 25 pixels around the perimeter of the nucleus, identified by the Hoechst staining.

316 To assess the extent of EV exchange at the cell-cell interface, HeLa cells expressing CD9-Halo were  
317 seeded on glass coverslips with HeLa cells, labelled for 1 hour with 2  $\mu\text{M}$  Calcein-AM (Thermo Fisher  
318 Scientific), at a 1:3,000 ratio (80% confluency at seeding) to maximize the possibility that EV donor cells  
319 were surrounded by a confluent monolayer of recipient cells after 48 hours. The day after seeding, cells  
320 were treated with 50 nM Bafilomycin A1 for 24 hours. Before imaging, the cells were incubated with JF549  
321 (5 nM, 1 hour of incubation) to label CD9 and Hoechst (10 minute of incubation) to stain nuclei. After  
322 extensive washes in complete media, the cells were imaged with the Nikon A1R confocal microscope  
323 using a Plan Fluor 40X oil immersion lens (NA:1.3); planes were spaced 0.3  $\mu\text{m}$  along the z axis and  
324 pixel size was 0.62  $\mu\text{m}$ .

325 Fields were selected with CD9-Halo cells in the center of the image. The images were segmented using  
326 a customized routine developed in MATLAB. First, the code generated a mask to outline the CD9-Halo  
327 cells (origin of the EVs). Then, an algorithm subdivided the rest of the image in concentric surfaces at  
328 increasing distance from the edge of the cell. The lateral size of the concentric masks was constant and  
329 approximately set to half of the diameter of an HeLa cell (14  $\mu\text{m}$ ).

330

### 331 **Lattice Light Sheet Microscopy (LLSM) live cell imaging, data acquisition and visualization.**

332 We imaged HeLa cells with a lattice light-sheet fluorescence microscope (Intelligent Imaging Innovation).  
333 Directly derived from the instrument patented by Dr. Eric Betzig and colleagues<sup>28</sup>, this system utilizes

334 Bessel beam lattice sheet illumination via cylindrical lenses and a high-speed spatial light modulator  
335 (SLM) for multicolor imaging, as well as an annular mask array for the formation of various light sheets  
336 and galvo mirrors to control lattice movement in x and z. It has cameras in the image and Fourier space  
337 to inspect the lattice and annular mask shapes. Assembled on an active vibration isolation table equipped  
338 with active and passive system for vibration cancellation (TMC, Ametek), it is equipped with four laser  
339 lines for sample excitation (405 nm, 300 mW, Omicron; 488 nm, 300 mW, Coherent; and 560 nm, 500  
340 mW and 642 nm, and 500 mW, MPB Communication) and the required filter sets necessary to efficiently  
341 image two color sets at a time (Semrock). Two water immersion objectives control the illumination  
342 (28×/0.67 NA) and detection (25×/1.1 NA, expanded to reach a final 62.5× magnification). Two piezo  
343 controllers operate the translations of the stage and of the objective. The instrument is also equipped  
344 with a temperature-controlled, 90 × 1,500 cm (36" × 60") specimen chamber maintained at 37°C. Images  
345 are acquired by two high-speed, high-resolution 2K x 2K sCMOS camera with 82% QE (ORCA-Flash4.0  
346 V3, Hamamatsu). A computer workstation (Dell) is equipped with the software SlideBook™ 6 (Intelligent  
347 Imaging Innovation) that fully controls the instrument (high-speed synchronization of laser firing, SLM  
348 pattern display, galvo movements, and imaging camera readout along with the ability to de-skew and  
349 view data).

350 *Data Acquisition and visualization.* To acquire the images, we illuminated the sample with a dithered light  
351 sheet generated in the square lattice configuration<sup>28</sup> using an excitation NA of 0.550/0.493 and full width  
352 at half maximum (FWHM) beam length of 15 μm. SUM159 cells stably expressing CD9-Halo or AP2-  
353 EGFP were excited for 35 ms with the 488-nm and 561-nm lasers at a power of 12 mW and 27 mW  
354 respectively, measured before the cylindrical lenses (500-mW laser, acousto-optic tunable filter 1 [AOTF  
355 1]). Image stacks were composed of 40 sequential planes of 768 x 512 pixels spaced 0.6 μm in sample  
356 scan mode (corresponding to 73 x 53 x 13 μm volume spaced 0.35 μm over the z axis after de-skewing).  
357 The movies we analyzed were composed of a variable number of stacks (from 234 up to 932) acquired  
358 every 3 seconds to generate movies spanning from 11 minutes to 46 minutes. For visualization, the de-  
359 skewed stacks (Intelligent Imaging Innovation) were deconvolved using the Lucy-Richardson algorithm  
360 (MATLAB, MathWorks) and rendered with a 5D viewer developed in MATLAB environment<sup>41</sup>. The 3D  
361 rendered images were exported as .tiff images or movies in .mp4 format.

362

### 363 **Flow cytometry and cell sorting**

364 HeLa or SUM159 cells plated on 6 well plates were transfected with CD9-Emerald or n-BFP. After 24  
365 hours, the cells were detached by 0.25% trypsin-EDTA (Thermo Fisher Scientific), counted, and mixed  
366 1:1 in a Falcon tube. For each condition, a total of 120,000 HeLa cells (60,000 CD9-Emerald and 60,000  
367 n-BFP) were mixed. In the experiments using SUM159, a total of 60,000 cells per condition were used  
368 (30,000 CD9-Emerald and 30,000 n-BFP).

369 Mixtures were seeded in multiwell plates and left to adhere and spread for 48 hours. The day after  
370 seeding, cells were treated with 50 nM Bafilomycin A1 for 24 hours. Then, the cell co-cultures were  
371 detached by 0.25% trypsin-EDTA, rinsed in complete media, and analyzed by flow cytometry (Gallios,

372 Beckman Coulter). Unstained cells and single-color controls (CD9-Emerald<sup>+</sup> and n-BFP<sup>+</sup>) were used to  
373 set photomultiplier voltages. Analyses were performed using Kaluza software (Beckman Coulter).  
374 Alternatively, double-positive n-BFP/CD9-Emerald cells were sorted using an ARIA III cell sorter (Beckton  
375 Dickinson and Company). Sorted cells were seeded on glass coverslip for cell imaging. After spreading,  
376 cells were labelled with 1  $\mu$ M Cell Trace-Far Red (Thermo Fisher Scientific) in serum-free medium for 20  
377 minutes. After two washes in complete medium, coverslips were inserted into a metal chamber for live-  
378 cell confocal imaging with a Nikon A1R microscope. Image stacks were acquired using a Plan Apo 100X  
379 oil immersion lens (NA:1.45); planes were spaced 0.25  $\mu$ m along the z axis and pixel size was 0.25  $\mu$ m.  
380 ImageJ (NIH) was used to project the images across the z axis.

381

### 382 **Cell viability assay**

383 A 3-(4,5-dimethylthiazol-2-yl)-2,5-diphenyltetrazolium bromide (MTT) assay was performed to assess cell  
384 viability upon treatment with Bafilomycin A1. HeLa cells plated in 96 well plates (10,000 cells/well) were  
385 treated with increasing concentrations of Bafilomycin A1 (0-400 nM) or its solvent (DMSO) for 24 hours.  
386 Afterwards, MTT (5 mg/ml) was added to each well and incubated at 37°C for 2 hours. The cell media  
387 was removed and replaced with DMSO to dissolve formazan crystals, the MTT metabolite. The plate was  
388 kept under agitation for 15 minutes, then the absorbance was measured at 560 nm using a plate reader  
389 (BioTek SynergyH1).

390

### 391 **Transmission Electron Microscopy (TEM) of EV pellets**

392 SUM159 cells were seeded at 70% confluence in two T175 flasks. After spreading, cells were washed in  
393 HBSS and incubated in Opti-MEM for 24 hours. The conditioned media was collected and centrifuged at  
394 5,000 x g for 10 minutes to remove cell debris. The resulting supernatants were transferred into  
395 ultracentrifuge-proof tubes and centrifuged for 1 hour and 30 minutes at 110,000 x g using a swing rotor  
396 (SW32, Beckman Coulter). The supernatants were discarded and the pellets were resuspended in 60  $\mu$ l  
397 of HBSS. 20  $\mu$ l of EV suspension were adsorbed onto 400-mesh formvar/carbon-coated grids for 10  
398 minutes at RT. Adherent EVs were stained with uranyl-acetate and immediately imaged using a Tecnai  
399 G2 Biotwin transmission electron microscope (FEI).

400

### 401 **Design and fabrication of plastic rings for cell co-culture**

402 Cell rings were designed using the online software Tinkercad (Autodesk). For the *Close* configuration,  
403 we designed rings of 1 cm radius and 0.5 cm height. For the *Far* configuration, we designed two rings (1  
404 cm radius and 0.5 cm height) connected by a stem of 4 cm. Rings were 3D-printed in a biocompatible  
405 resin (*Surgical Guide*) using a Form 3B+ printer (Formlabs) following the company's protocol. After  
406 printing, the rings were washed extensively in iso-propanol and cured. The curing procedure consisted  
407 of simultaneously exposing the printed parts to heat (60°C) and light (405nm) for 60 minutes in a Form  
408 Cure station (Formlabs).

409 Ring patterns were placed into 10 cm Petri dishes. To plate cells in the *Close* configuration, we mixed  
410 HeLa cells transfected with CD9-Emerald or n-BFP at a 1:1 ratio. The *Far* configuration consisted of  
411 plating donor and recipient cells in two different rings connected by a 4 cm stem. 60,000 HeLa cells  
412 transfected with CD9-Emerald were plated in one ring and 60,000 HeLa cells transfected with n-BFP  
413 were plated in the other ring. After 24 hours, the culture media and the rings themselves were removed  
414 from the dishes. The Petri dishes were then washed in HBSS and the cells were incubated in complete  
415 DMEM media. The following day, the cells were treated with 50 nM Bafilomycin A1 for 24 hours. Some  
416 plates were placed on an orbital shaker at 37°C to promote media movement while other plates were  
417 kept still in the incubator. After 24 hours, cells were detached by trypsinization, centrifuged, and analyzed  
418 by flow cytometry to measure the percentage of double-positive CD9-Emerald/n-BFP cells.

419

#### 420 **Transferrin-647 uptake to evaluate the functionality of clathrin-mediated endocytosis**

421 HeLa CLTC were treated or not with 0.5 µg/ml doxycyclin for one week to induce the expression of shRNA  
422 specific for clathrin heavy chain. Then, the cells were washed with HBSS and exposed to 0.5 µg/ml  
423 Transferrin-Alexa Fluor 647 (A647-Tf, Thermo Fisher Scientific) dissolved in complete DMEM for 10  
424 minutes at 37°C. Afterwards, the dishes containing the cells were set on ice to block endocytosis and the  
425 cells were washed with ice-cold HBSS. To measure the amount of transferrin receptor present at rest on  
426 the cell surface, cells in other wells were exposed to A647-Tf at 4°C for 10 minutes. To remove the  
427 surface-bound fluorescent ligand, some wells were exposed twice to an acidic solution for 1 minute (150  
428 mM NaCl and 0.1 M glycine, pH 2.5). After two additional washes in ice cold HBSS, the cells were  
429 detached by trypsinization, collected in flow tubes containing 1 ml of media to inactivate trypsin,  
430 centrifuged at 300 x g, and resuspended in ice-cold media. The samples were then quantified by flow  
431 cytometry (Gallios, Beckman Coulter) and the resulting data were analyzed by Kaluza software (Beckman  
432 Coulter). Transferrin internalization was normalized to the amount of surface bound. The experiment was  
433 repeated three times and the normalized means obtained across the experiments were compared using  
434 an unpaired t-test (GraphPad Prism).

435

#### 436 **Statistical analysis and figure preparation**

437 Statistical analyses were performed using the software Prism (GraphPad); figures were assembled in  
438 Adobe Illustrator (Adobe).

439

#### 440 **ACKNOWLEDGEMENTS**

441 We thank Jeff Tonniges (The Ohio State University, CMIF) for helping with TEM sample staining and  
442 image acquisition. We acknowledge the use of Microscopy, Genomics, and Flow Cytometry Shared  
443 Resources at The Ohio State University, which are supported by the National Cancer Institute (NCI,  
444 P30CA016058). We thank the Advanced Imaging Center (AIC) at Janelia Research Campus for training  
445 on their LLSFM, John M Heddleston, Eric Wait, Satya Khuon, and Teng-Leong Chew from the AIC team.  
446 The AIC is jointly supported by the Howard Hughes Medical Institute and the Gordon and Betty Moore

447 Foundation. E.C. was supported by the OSU Comprehensive Cancer Center and the Ohio Cancer  
448 Research via the McCurdy/Kimball Midwest Research Fund. F. C. was supported by an American-Italian  
449 Cancer Foundation Post-Doctoral Research Fellowship and by a Pelotonia Post-Doctoral Fellowship.

450

#### 451 **AUTHORS' CONTRIBUTIONS**

452 E.C. conceived and supervised the research; F.C. and E.C. designed research; F.C. and E.G.N.  
453 performed research; F.C. and E.C. analyzed data; E.C. wrote the first draft of the manuscript; All authors  
454 contributed and agreed on the final version of the paper.

455 **REFERENCES**

- 456 1. Cocucci, E. & Meldolesi, J. Ectosomes and exosomes: Shedding the confusion between  
457 extracellular vesicles. *Trends in Cell Biology* **25**, 364–372 (2015).
- 458 2. Colombo, F. *et al.* Cytokines stimulate the release of microvesicles from myeloid cells  
459 independently from the P2X7 receptor/acid sphingomyelinase pathway. *Frontiers in Immunology*  
460 **9**, 1–15 (2018).
- 461 3. Vader, P., Breakefield, X. O. & Wood, M. J. a. Extracellular vesicles: emerging targets for cancer  
462 therapy. *Trends Mol Med* **20**, 385–393 (2014).
- 463 4. Bao, Q. *et al.* Tumor-Derived Extracellular Vesicles Regulate Cancer Progression in the Tumor  
464 Microenvironment. *Frontiers in Molecular Biosciences* vol. 8 (2022).
- 465 5. Yekula, A. *et al.* From laboratory to clinic: Translation of extracellular vesicle based cancer  
466 biomarkers. *Methods* vol. 177 58–66 (2020).
- 467 6. Pang, B. *et al.* Extracellular vesicles: The next generation of biomarkers for liquid biopsy-based  
468 prostate cancer diagnosis. *Theranostics* vol. 10 2309–2326 (2020).
- 469 7. Lo, Y. M. D. & Lam, W. K. J. Towards multi-cancer screening using liquid biopsies. *Nature*  
470 *Reviews Clinical Oncology* **17**, 525–526 (2020).
- 471 8. Lakshmi, S. *et al.* Exosomes in Alzheimer’s Disease: Potential Role as Pathological Mediators,  
472 Biomarkers and Therapeutic Targets. *Neurochemical Research* vol. 45 2553–2559 (2020).
- 473 9. Picca, A. *et al.* Circulating extracellular vesicles: Friends and foes in neurodegeneration. *Neural*  
474 *Regeneration Research* vol. 17 534–542 (2022).
- 475 10. Pinnell, J. R., Cui, M. & Tieu, K. Exosomes in Parkinson disease. *Journal of Neurochemistry* vol.  
476 157 413–428 (2021).
- 477 11. Armstrong, D. & Wildman, D. E. Extracellular vesicles and the promise of continuous liquid  
478 biopsies. *Journal of Pathology and Translational Medicine* **52**, 1–8 (2018).
- 479 12. Zomer, A. *et al.* In Vivo Imaging Reveals Extracellular Vesicle-Mediated Phenocopying of  
480 Metastatic Behavior. *Cell* **161**, 1046–1057 (2015).
- 481 13. Flanagan, L., Van Weelden, K., Ammerman, C., Ethier, S. P. & Welsh, J. E. SUM-159PT cells: a  
482 novel estrogen independent human breast cancer model system. *Breast Cancer Res Treat* **58**,  
483 193–204 (1999).
- 484 14. Vestad, B. *et al.* Size and concentration analyses of extracellular vesicles by nanoparticle  
485 tracking analysis: a variation study. *Journal of Extracellular Vesicles* **6**, (2017).
- 486 15. Rikkert, L. G., Nieuwland, R., Terstappen, L. W. M. M. & Coumans, F. A. W. Quality of  
487 extracellular vesicle images by transmission electron microscopy is operator and protocol  
488 dependent. *Journal of Extracellular Vesicles* **8**, (2019).
- 489 16. Jackson, C. E., Scruggs, B. S., Schaffer, J. E. & Hanson, P. I. Effects of Inhibiting VPS4 Support  
490 a General Role for ESCRTs in Extracellular Vesicle Biogenesis. *Biophysical Journal* **113**, 1342–  
491 1352 (2017).
- 492 17. Mathieu, M. *et al.* Specificities of exosome versus small ectosome secretion revealed by live  
493 intracellular tracking of CD63 and CD9. *Nature Communications* **12**, 2020.10.27.323766 (2021).
- 494 18. Heusermann, W. *et al.* Exosomes surf on filopodia to enter cells at endocytic hot spots, traffic  
495 within endosomes, and are targeted to the ER. *Journal of Cell Biology* **213**, 173–184 (2016).

- 496 19. Chen, C. *et al.* Imaging and Intracellular Tracking of Cancer-Derived Exosomes Using Single-  
497 Molecule Localization-Based Super-Resolution Microscope. *ACS Applied Materials and*  
498 *Interfaces* (2016) doi:10.1021/acsami.6b09442.
- 499 20. Maugeri, M. *et al.* Linkage between endosomal escape of LNP-mRNA and loading into EVs for  
500 transport to other cells. *Nature Communications* (2019) doi:10.1038/s41467-019-12275-6.
- 501 21. Joshi, B. S., Beer, M. A. De, Giepmans, B. N. G. & Zuhorn, I. S. Endocytosis of Extracellular  
502 Vesicles and. (2020) doi:10.1021/acsnano.9b10033.
- 503 22. Day, R. N. & Davidson, M. W. The fluorescent protein palette: Tools for cellular imaging.  
504 *Chemical Society Reviews* **38**, 2887–2921 (2009).
- 505 23. Bonsergent, E. *et al.* Quantitative characterization of extracellular vesicle uptake and content  
506 delivery within mammalian cells. *Nature Communications* **12**, (2021).
- 507 24. Willy, N. M. *et al.* CALM supports clathrin-coated vesicle completion upon membrane tension  
508 increase. *Proc Natl Acad Sci U S A* **118**, e2010438118 (2021).
- 509 25. Cocucci, E., Aguet, F., Boulant, S. & Kirchhausen, T. The first five seconds in the life of a  
510 clathrin-coated pit. *Cell* **150**, 495–507 (2012).
- 511 26. Cashikar, A. G. & Hanson, P. I. A cell-based assay for CD63-containing extracellular vesicles.  
512 *PLoS ONE* (2019) doi:10.1371/journal.pone.0220007.
- 513 27. Eitan, E., Suire, C., Zhang, S. & Mattson, M. P. Impact of lysosome status on extracellular  
514 vesicle content and release. *Ageing Research Reviews* **32**, 65–74 (2016).
- 515 28. Chen, B.-C. B. C. *et al.* Lattice light-sheet microscopy: Imaging molecules to embryos at high  
516 spatiotemporal resolution. *Science* (1979) **346**, 1257998–1257998 (2014).
- 517 29. Elgamal, S., Colombo, F., Cottini, F., Byrd, J. C. & Cocucci, E. Imaging intercellular interaction  
518 and extracellular vesicle exchange in a co-culture model of chronic lymphocytic leukemia and  
519 stromal cells by lattice light-sheet fluorescence microscopy. in *Methods in Enzymology* vol. 645  
520 79–107 (Academic Press Inc., 2020).
- 521 30. Zheng, Q. & Lavis, L. D. Development of photostable fluorophores for molecular imaging.  
522 *Current Opinion in Chemical Biology* vol. 39 32–38 (2017).
- 523 31. Aguet, F. *et al.* Membrane dynamics of dividing cells imaged by lattice light-sheet microscopy.  
524 *Molecular Biology of the Cell* **27**, 3418–3435 (2016).
- 525 32. Lee, B. J., Cheema, Y., Bader, S. & Duncan, G. A. Shaping nanoparticle diffusion through  
526 biological barriers to drug delivery. *JCIS Open* **4**, 100025 (2021).
- 527 33. Caldieri, G. *et al.* Reticulon 3-dependent ER-PM contact sites control EGFR nonclathrin  
528 endocytosis. *Science* (1979) **356**, 617–624 (2017).
- 529 34. Lopez-Leal, R. & Court, F. A. Schwann Cell Exosomes Mediate Neuron–Glia Communication  
530 and Enhance Axonal Regeneration. *Cellular and Molecular Neurobiology* vol. 36 429–436  
531 (2016).
- 532 35. Choudhuri, K. *et al.* Polarized release of T-cell-receptor-enriched microvesicles at the  
533 immunological synapse. *Nature* **507**, 118–123 (2014).
- 534 36. Stauffer, O. *et al.* Vesicle Induced Receptor Sequestration: Mechanisms behind Extracellular  
535 Vesicle-Based Protein Signaling. *Advanced Science* 2200201 (2022)  
536 doi:10.1002/advs.202200201.



- 537 37. Higginbotham, J. N. *et al.* Amphiregulin exosomes increase cancer cell invasion. *Current Biology*  
538 **21**, 779–786 (2011).
- 539 38. Gibson, D. G. *et al.* Enzymatic assembly of DNA molecules up to several hundred kilobases.  
540 *Nature Methods* **6**, 343–345 (2009).
- 541 39. Grimm, J. B. *et al.* A general method to improve fluorophores for live-cell and single-molecule  
542 microscopy. *Nature Methods* **12**, 244–250 (2015).
- 543 40. Carpenter, A. E. *et al.* CellProfiler: Image analysis software for identifying and quantifying cell  
544 phenotypes. *Genome Biology* **7**, 1–11 (2006).
- 545 41. Wait, E., Winter, M. & Cohen, A. R. Hydra image processor: 5-D GPU image analysis library with  
546 MATLAB and python wrappers. *Bioinformatics* (2019) doi:10.1093/bioinformatics/btz523.
- 547
- 548

549 **FIGURES, FIGURE LEGENDS, AND MOVIE LEGENDS**

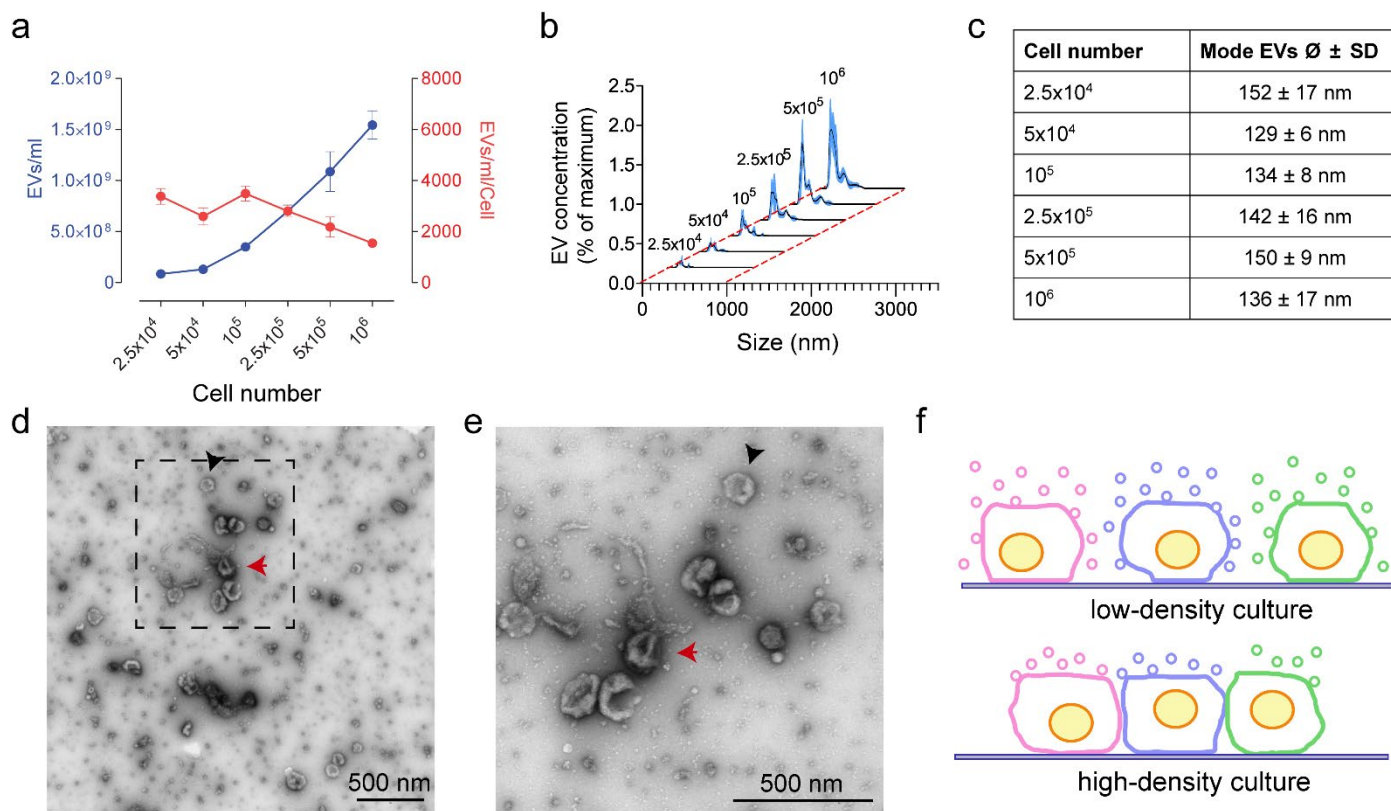

550

551 **Figure 1. The number of EVs collected in the supernatant is inversely proportional to cell density.**

552 **a-c**, SUM159 cells were plated (6-well plate; well surface = 9.6 cm<sup>2</sup>) at increasing densities in Opti-MEM  
553 for 24 hours. After removing cell debris from the supernatants of each sample by centrifugation (5,000 x  
554 g for 10 minutes), both the EV concentration and the size distribution were assessed by Nanoparticle  
555 Tracking Analysis (NTA). **a**, While EV concentration increases with the number of cells (blue line), the  
556 number of EVs released per cell is inversely proportional to cell density (red line). The graph reports the  
557 mean  $\pm$  SEM of three independent experiments. **b**, Size frequency distributions (mean = black line; SD  
558 = blue area) of EVs collected from cells plated at increasing numbers (indicated on top of each peak).  
559 Increasing cell density did not significantly influence the distribution of EV sizes. As tabulated in **c**, the  
560 mean of the modal peak across all cell densities was between 129 and 152 nm. The plotted curves in **b**  
561 and the quantification in **c** are the mean of three independent experiments. **d-e**, TEM micrographs of EVs  
562 obtained from Opti-MEM conditioned by SUM159 cells for 24 hours. EVs were enriched by  
563 ultracentrifugation (110,000 x g for 1 hour) and the resulting pellets were negatively stained with uranyl  
564 acetate for visualization. A magnification of the area delimited by the black dashed square in **d** is shown  
565 in **e**. **f**, Illustration of the proposed relationship between cell density and EV retrieval from the supernatant.  
566 When cells are sparsely distributed, EVs can be released from both the apical and the lateral surfaces of  
567 the cells and promptly reach the extracellular space (top panel). In contrast, at high cell density only EVs  
568 released from the apical surface can promptly reach the extracellular space (bottom panel).

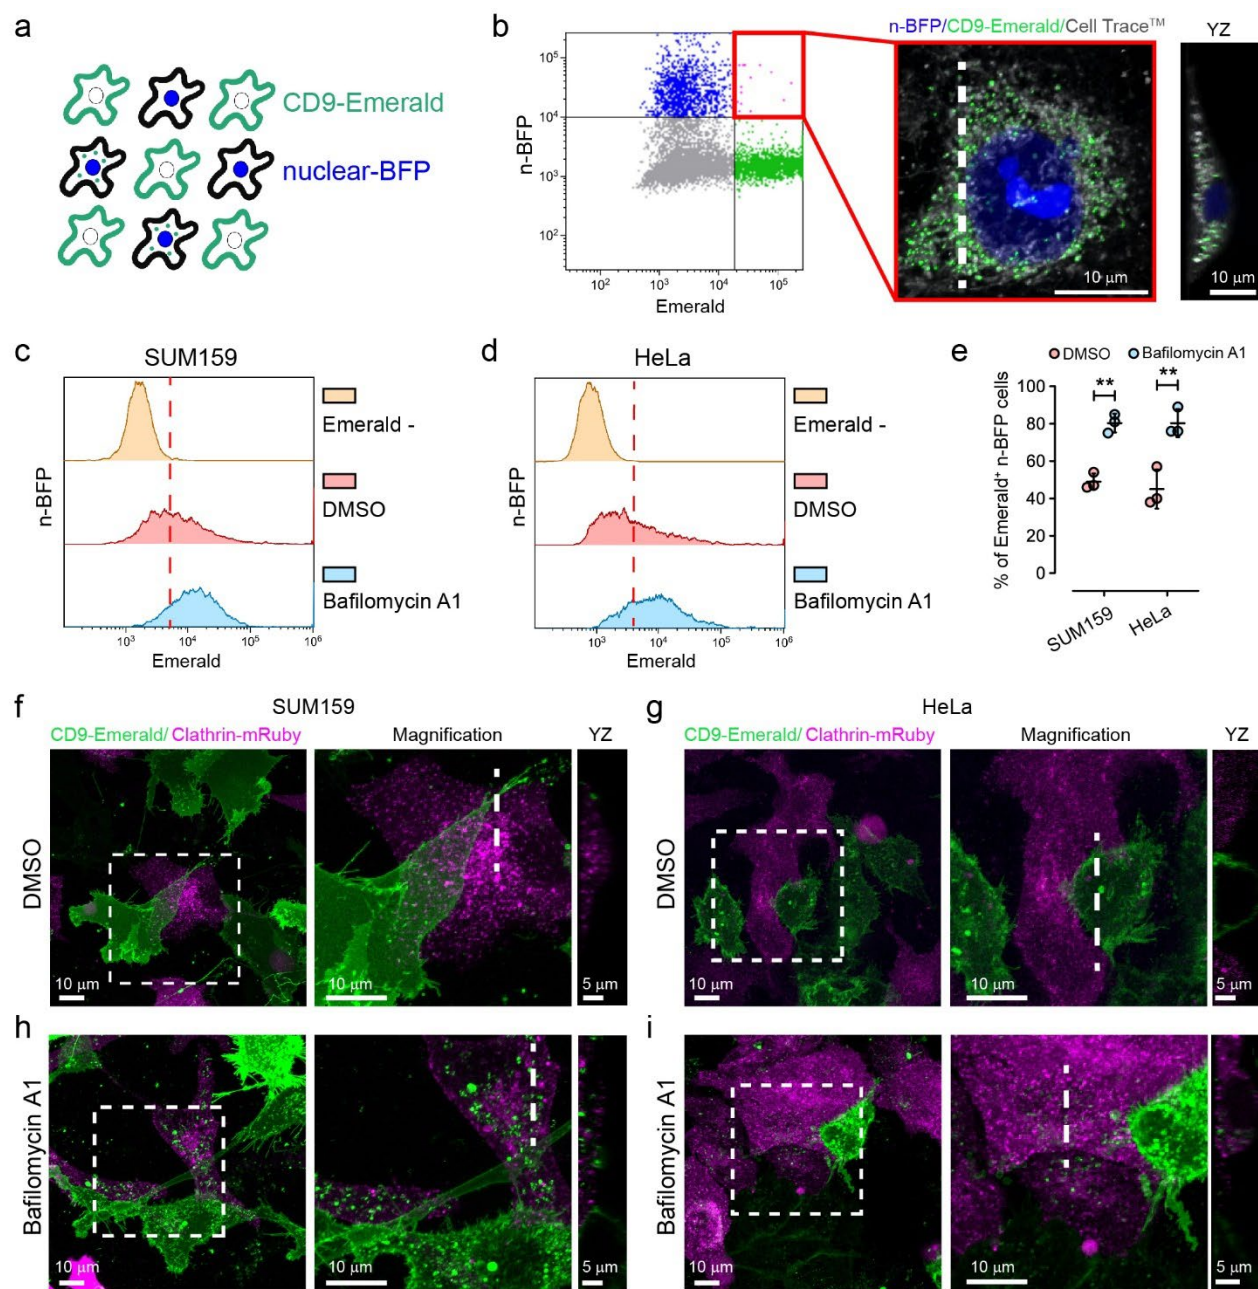

569

570 **Figure 2. Endosomal alkalization reveals EV exchange in high-density cultures.**

571 **a-e**, Flow cytometry assay to define the fraction of recipient cells that engulf EVs. **a**, Scheme representing  
572 the co-culture of CD9-Emerald and n-BFP cells. **b**, representative flow cytometry analysis (left) and  
573 confocal microscopy analysis of sorted n-BFP<sup>+</sup>/CD9-Emerald<sup>+</sup> HeLa cells (right). The confocal Z  
574 projection and relative YZ profile (computed at the white dashed line) show that EVs are engulfed in the  
575 intracellular space of the recipient cells. The confocal data is composed of 40 planes spaced every 250  
576 nm on the z axis. **c-d**, The fraction of SUM159 and HeLa cells recipient cells (n-BFP<sup>+</sup>) internalizing EVs  
577 (n-BFP<sup>+</sup>/CD9-Emerald<sup>+</sup> cells) was quantified by flow cytometry. The co-cultures exposed to Bafilomycin  
578 or DMSO are shown in blue and red respectively. In yellow, cultures solely composed of n-BFP<sup>+</sup> cells  
579 (Emerald-) were used as negative controls to define the threshold for Emerald<sup>+</sup> signal (red dashed line).  
580 **e**, Statistical analysis of three independent co-culture experiments (mean ± SEM). The fraction of cells  
581 that engulfed EVs increased from 49 ± 2% to 80 ± 3% (1.6 times; mean ± SD) in SUM159 and from 45 ±

582 6% to  $80 \pm 4\%$  (1.8 times; mean  $\pm$  SD) in HeLa cells when treated with Bafilomycin in comparison to the  
583 vehicle. Data were compared using a two-tailed t-test where \*\* p-value < 0.001. **f-i**, Co-cultures set up  
584 using CD9-Emerald donor cells and Clathrin-mRuby recipient cells were imaged by live cell confocal  
585 microscopy. Donor and recipient cells were mixed and seeded at a 1:1 ratio to reach 80% confluence  
586 after 48 hours. Experiments were performed using either SUM159 (**f,h**) or HeLa cells (**g,i**). After 24 hours  
587 of incubation, the co-cultures were exposed to 50 nM Bafilomycin A1 or its solvent (DMSO) for an  
588 additional 24 hours. Overall, these experiments suggest that upon internalization, EVs are trafficked  
589 through the cell and degraded in lysosomes.

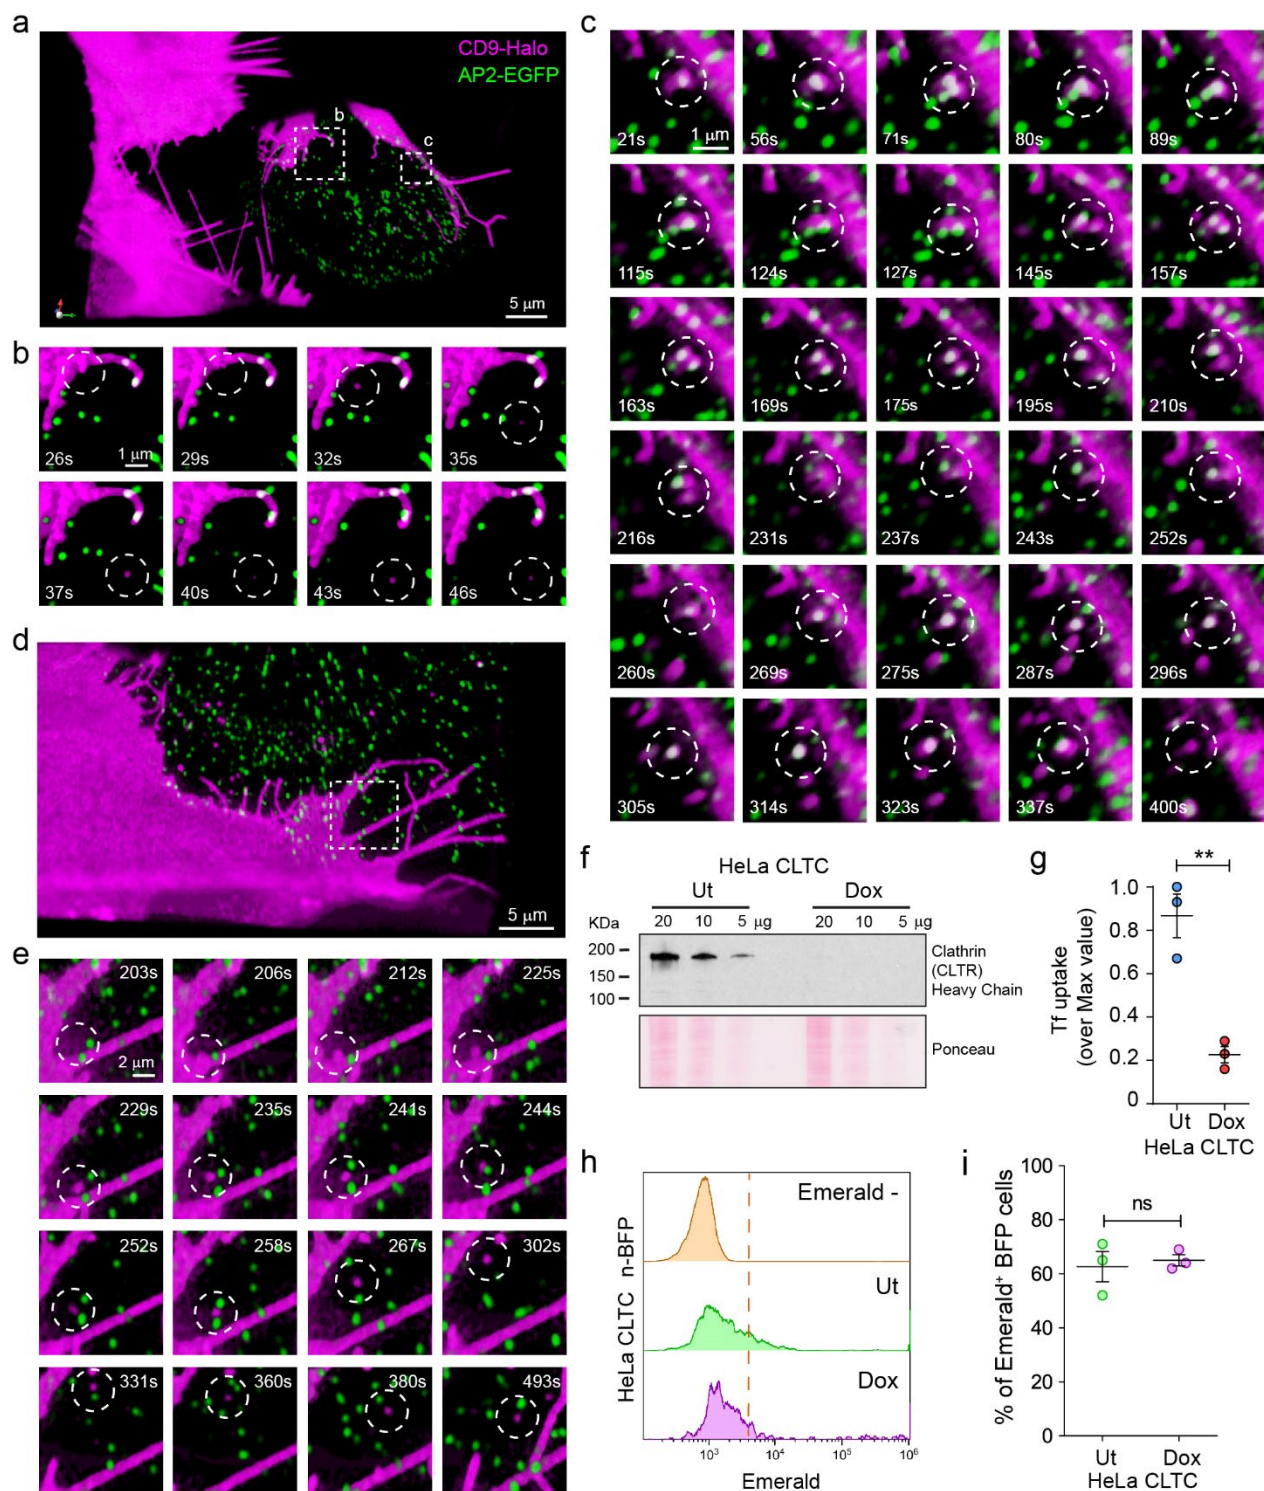

590

591 **Figure 3. 5-D microscopy reveals both the dynamics of EV transfer, and that EV uptake is**  
 592 **independent of clathrin-mediated endocytosis.** **a-e**, SUM159 cells expressing either CD9-Halo (EV  
 593 donor) or AP2-EGFP were mixed and seeded at a 1:1 ratio, stained with 5 nM JF549 for 1 hour, and  
 594 imaged by Lattice Light Sheet Microscopy (LLSM). All movies were acquired in sample scan mode and  
 595 were composed of sequential volumes of 73 x 53 x 13 μm (corresponding to 40 sequential optical sections  
 596 acquired with 35 ms of exposure for each channel and spaced every 350 nm after de-skewing; the final  
 597 frequency of acquisition of the movie was of 0.3 Hz).

598 **a,d**, Three-dimensional renderings extrapolated from Movie 1 and 2. The dotted squares define the  
599 regions corresponding to the magnified image sequences plotted in panels b, c, and e. **b,e**, Internalized  
600 CD9<sup>+</sup> EVs. The lack of co-localization between CD9-Halo and AP2-EGFP upon vesicle internalization  
601 (white circle) suggests that clathrin mediated endocytosis (CME) does not support CD9<sup>+</sup> EV uptake. **c**,  
602 An example of a CD9<sup>+</sup> EV that remained at the cell-cell interface for more than 5 minutes without being  
603 efficiently internalized by clathrin coated vesicles despite recurrent colocalization with AP2-EGFP puncta  
604 (see also Movie 1). **f-i** To assess the role of CME in CD9<sup>+</sup> EV uptake, HeLa cells stably expressing a  
605 doxycycline (Dox)-inducible shRNA sequence against clathrin heavy chain (HeLa CLTC) were cultured  
606 in the presence of Dox for one week to downregulate clathrin expression. **f**, Immunoblotting demonstrated  
607 that the Dox-inducible shRNA system abolished the expression of clathrin heavy chain as compared to  
608 untreated (Ut) cells. **g**, Clathrin heavy chain depletion impairs CME. HeLa CLTC depleted (Dox) or not  
609 (Ut) of clathrin heavy chain were exposed to fluorescently labelled transferrin (A647-Tf), a CME cargo,  
610 for 15 minutes at 37°C to allow the ligand to internalize (Tf<sub>INT</sub>), or at 4°C to label the surface receptor by  
611 preventing its endocytosis (Tf<sub>SRF</sub>). After washes, the cells were analyzed by flow cytometry. The graph  
612 shows the ratios between Tf<sub>INT</sub> and Tf<sub>SRF</sub> represented as % of the maximal value (three independent  
613 experiments, mean ± SEM). Data were compared using a two-tailed t-test. \*\* p-value < 0.001. **h**, HeLa  
614 cells expressing CD9-Emerald were co-cultured at high density (80% confluence at 48 hours) with either  
615 HeLa CLTC Ut-n-BFP or HeLa CLTC Dox-n-BFP. 24 hours post-seeding, the cells were treated with 50  
616 nM Bafilomycin for 4 hours before quantifying the fraction of double-positive CD9-Emerald/n-BFP cells  
617 by flow cytometry. The results from three independent experiments were summarized in **i** (data analysis  
618 was performed using a two-tailed t-test; ns = not significant) and indicated that CME does not significantly  
619 contribute to the uptake of CD9<sup>+</sup> EVs.

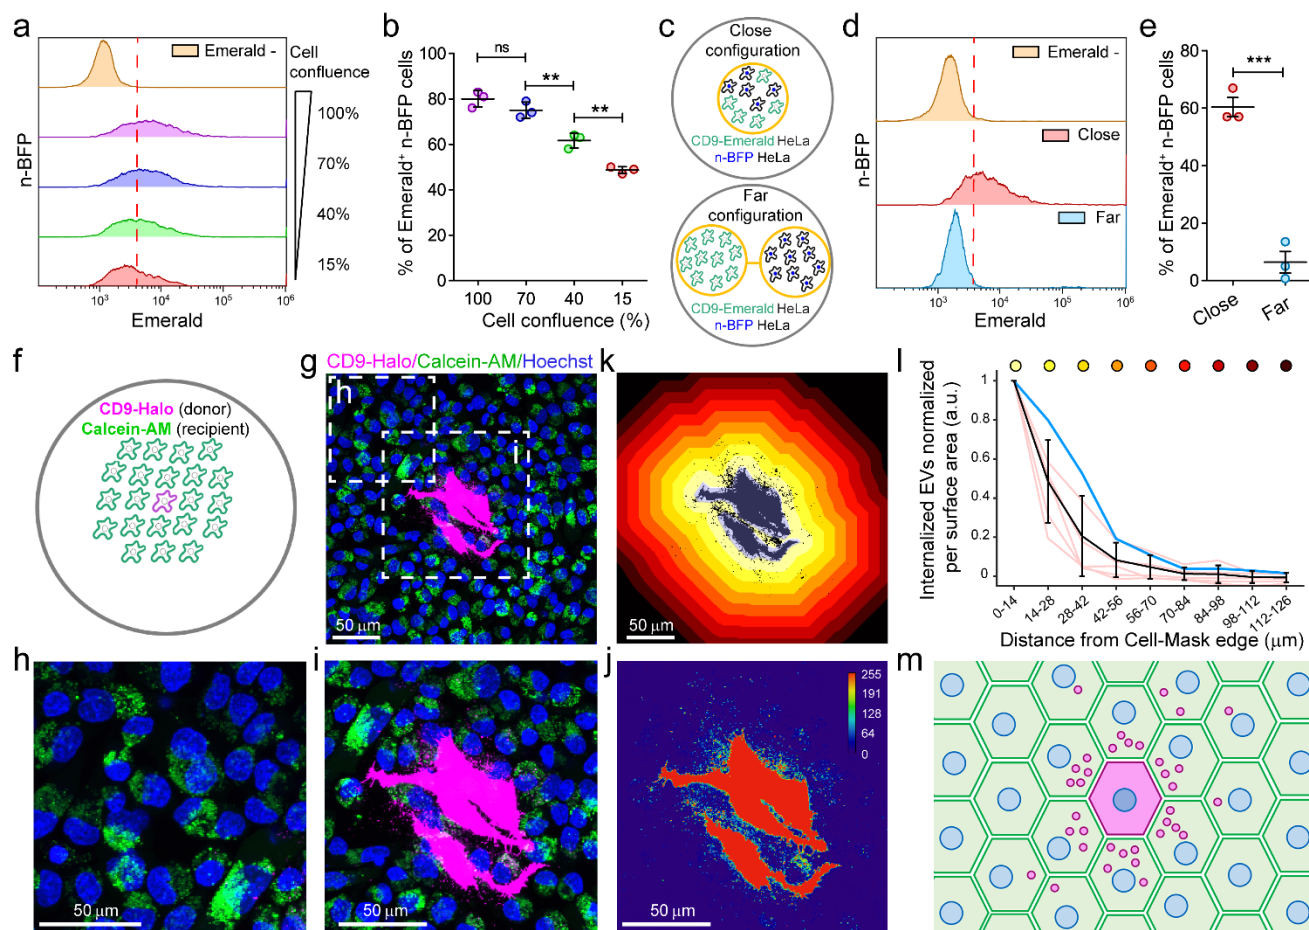

620

621 **Figure 4. EV exchange is favored by cell proximity.**

622 **a,b** Co-cultures of HeLa cells expressing either n-BFP or CD9-Emerald were used to assess the impact  
623 of cell proximity on the efficiency of EV exchange. To do so, EV donor (CD9-Emerald) and EV recipient  
624 (n-BFP) cells were seeded at decreasing cell densities (100%-15%; confluence at 48 hours). 24 hours  
625 post-seeding, the cells were treated with 50 nM Bafilomycin for an additional 24 hours before analysis by  
626 flow cytometry. **a**, The density plots show the density distributions of n-BFP<sup>+</sup> cells according to the CD9-  
627 Emerald signal, in function of the cell density. The double-positive cell populations correspond to the  
628 events in the histograms on the right side of the red line, which marks the threshold for Emerald<sup>+</sup> signal,  
629 defined using the control population (nBFP<sup>+</sup>/Emerald<sup>-</sup> cells). The results from three independent  
630 experiments (mean ± SD) are shown in the graph in **b**. Data were compared using One-way ANOVA and  
631 Tukey's *post-hoc* test (ns = not significant; \*\* p-value < 0.001). **c-e**, To further explore the effect of the  
632 intercellular distance on the amount of EV transfer, custom-made rings (1 cm radius, 0.5 cm height)  
633 were printed in a biocompatible material using a stereolithographic 3D device (Formlabs). The rings were used  
634 as mobile chambers to control the distance between EV donor and EV recipient cells when plating. The  
635 pictogram in **c** outlines the *Close* and *Far* configurations that characterize the experiment (for more  
636 details, see Fig S4 a-d). *Close* configuration (Top panel): EV donor (CD9-Emerald) and EV recipient cells  
637 (n-BFP) were seeded together at a 1:1 ratio in one ring in the middle of the dish (100% final confluence)  
638 to generate a dense co-culture. *Far* configuration (Bottom panel): using two connected rings (4 cm apart),  
639 an equal number of EV donor (CD9-Emerald) and EV recipient (n-BFP) cells were seeded in each ring.

640 After 24 hours, the rings were removed in both conditions and the dishes were filled with complete media  
641 supplemented with 50 nM Bafilomycin. 24 hours post-treatment, the cells were detached and analyzed  
642 by flow cytometry to compare the efficiency of EV transfer when the two cell types were seeded together  
643 versus separately. One representative experiment is shown in **d** while data from three independent  
644 experiments are summarized in **e**. **d**, n-BFP<sup>+</sup> cells seeded without donor cells were used as negative  
645 controls to define the threshold for Emerald<sup>+</sup> signal (yellow distribution and red dashed line). The red and  
646 blue distributions depict the CD9-Emerald intensities that were recorded in the n-BFP<sup>+</sup> recipient cell  
647 population when co-cultured in either the *Close* (red) or *Far* (blue) configurations with CD9-Emerald donor  
648 cells. **e**, When cells were cultured in the *Close* configuration,  $60 \pm 6\%$  (mean  $\pm$  SEM) of n-BFP<sup>+</sup> cells had  
649 internalized CD9-Emerald<sup>+</sup> EVs. In contrast, only  $6.4 \pm 6\%$  (mean  $\pm$  SEM) of n-BFP<sup>+</sup> cells cultured in the  
650 *Far* configuration received EVs from the CD9-Emerald donor cells located 4 cm away. The differences in  
651 EV transfer between the two configurations were statistically significant (data analysis was performed  
652 using a two-tailed t-test where \*\*\* p-value < 0.0001). **f-i**, To assess the propagation of EVs between  
653 adjacent cells, we set up a co-culture system as depicted in **f**. HeLa cells expressing CD9-Halo were co-  
654 seeded on glass coverslips with HeLa cells labelled with Calcein-AM at a 1:3,000 ratio and 80% seeding  
655 density to maximize the possibility that EV donor cells were surrounded by a confluent monolayer of  
656 recipient cells after 48 hours. 24 hours post-seeding, the cells were treated with 50 nM Bafilomycin for  
657 24 hours. Before imaging, the cells were incubated with 5 nM JF549 for 1 hour to label CD9-Halo.  
658 Additionally, the cells were incubated with Hoechst for 10 minutes to stain nuclei. After two washes in  
659 complete media, the cells were imaged by confocal microscopy (**g**). Magnification of an area at the edge  
660 of **g** (**h**) shows negligible CD9-Halo fluorescence in comparison to the accumulation of CD9<sup>+</sup> EVs  
661 observed within recipient cells in immediate proximity to the donor cells (**i**, **j**). **k**, To quantify the  
662 accumulation of EVs in recipient cells within the context of their proximity to donor cells, we developed a  
663 segmentation analysis that correlates CD9-Halo fluorescence intensity with distance from the edge of the  
664 nearest donor cell. We did this by normalizing the absolute CD9-Halo intensity to the respective  
665 segmented surface area. The results in **l** show that the majority of EVs are transferred to cells that are  
666 within 28  $\mu$ m of the edge of a donor cell. The color-coded dots correspond to the segmented surface  
667 areas shown in **k**. **m**, Illustration of the proposed mechanism of EV transfer. Cell density is a major  
668 determinant of EV exchange. When cells are densely packed, EVs are captured by adjacent cells and  
669 only a limited fraction can reach extracellular fluids. Moreover, fast diffusion of EVs in extracellular space  
670 limits their capture by distant cells. These data, when extrapolated to three dimensions, suggest that EVs  
671 detected in bodily fluids mainly originate from cells directly exposed to them. Consequently, blood and  
672 endothelial cells are the main source of circulating EVs while the contribution of other tissues is limited.  
673 However, changes in physical parameters such as intraparenchymal pressure and endothelial  
674 permeability may promote EV escape. Since these properties are strongly influenced by pathological  
675 conditions such as inflammation, these data provide experimental evidence to support the notion that  
676 EVs are important resources for the development of liquid biopsy approaches.



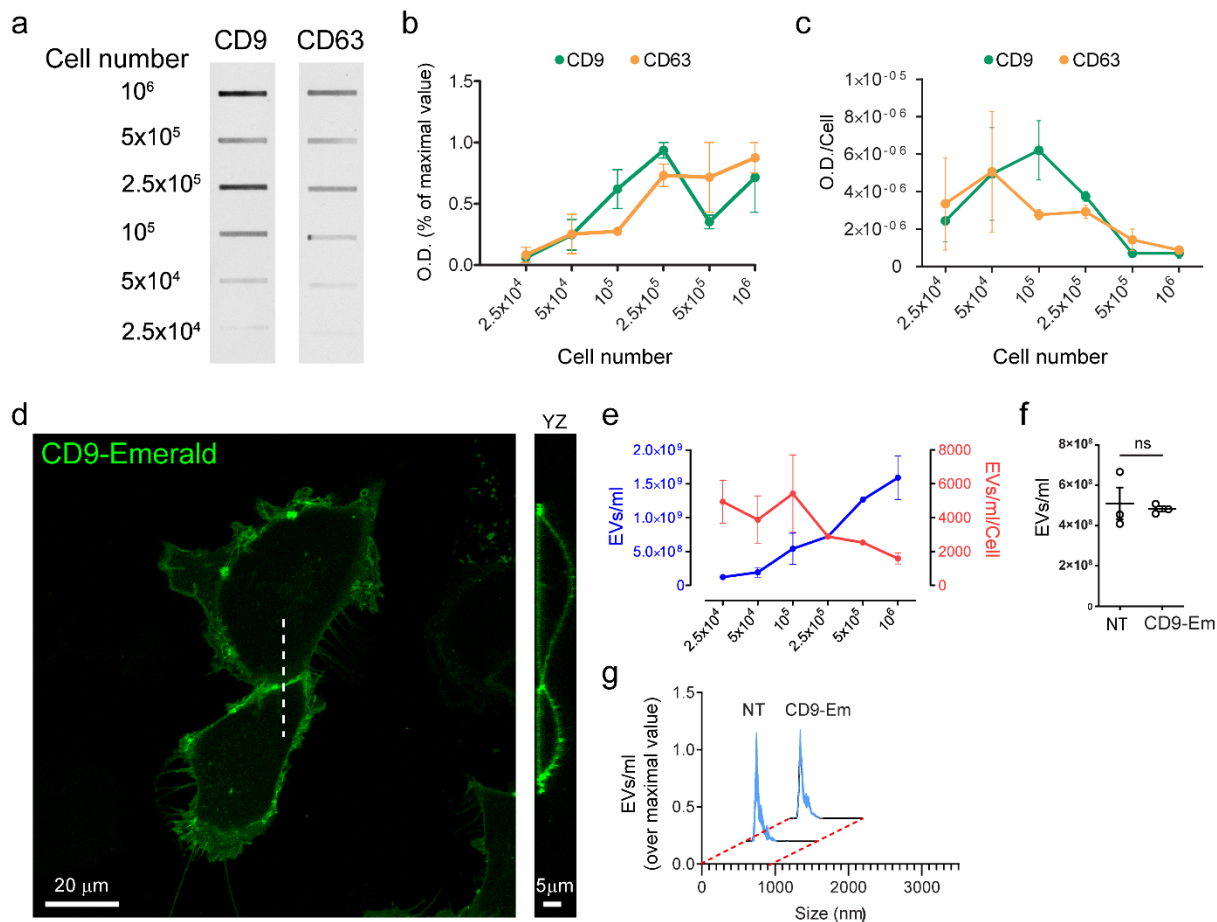

677

678 **Figure S1. Cell density influences the release of CD9<sup>+</sup> and CD63<sup>+</sup> EVs equally and CD9-Emerald**  
 679 **overexpression does not affect either the number or the size distribution of EVs.**

680 **a-c**, Cell supernatants, from the experiment in Fig.1, cleared from debris were immunoblotted to assess  
 681 the relative amount of ectosomes (CD9<sup>+</sup> EVs) and exosomes (CD63<sup>+</sup> EVs) released by cells as plating  
 682 density increased. The O.D. values from the slot blot in **a** are represented as absolute values in **b**  
 683 and normalized on the cell number in **c**. Notice that the absolute intensities of both CD9 and CD63 tend to  
 684 increase with increasing cell density (**b**) while the signals decrease when normalized to the number of  
 685 cells (**c**). This suggests that the number of CD9<sup>+</sup> and CD63<sup>+</sup> EVs per cell decreases upon increased cell  
 686 density. **d**, SUM159 cells expressing CD9-Emerald were imaged by confocal microscopy. Three  
 687 dimensional volumes were acquired by collecting 22 planes spaced by 500 nm steps in the axial  
 688 dimension. A representative single plane and the relative YZ profile show that CD9-Emerald is almost  
 689 exclusively distributed at the cell surface. The white dashed line indicates the plane at which the YZ  
 690 profile was computed. **e-g**, The concentration of EVs in the supernatants cleared from debris (5,000 x g,  
 691 10 minutes) of untransfected (NT) SUM159 and SUM159 expressing CD9-Emerald was measured by  
 692 Nanoparticle Tracking Analysis (NTA). **e**, The graph (mean ± SEM from three independent experiments)  
 693 shows the absolute EV concentration (blue line) and the number of EVs released per cell (red line) in the  
 694 supernatants of SUM159 cells expressing CD9-Emerald. These results follow a similar trend to that of  
 695 the control (Fig. 1a).

696 Additionally, CD9-Emerald expression neither affects EV concentration (**f**) nor dimension (**g**), and the  
697 results reflect the sizes observed for the controls (Fig. 1b-c). Both **f** and **g** show the mean  $\pm$  SD of three  
698 independent experiments. Data were compared using a two-tailed t-test (ns = not significant).

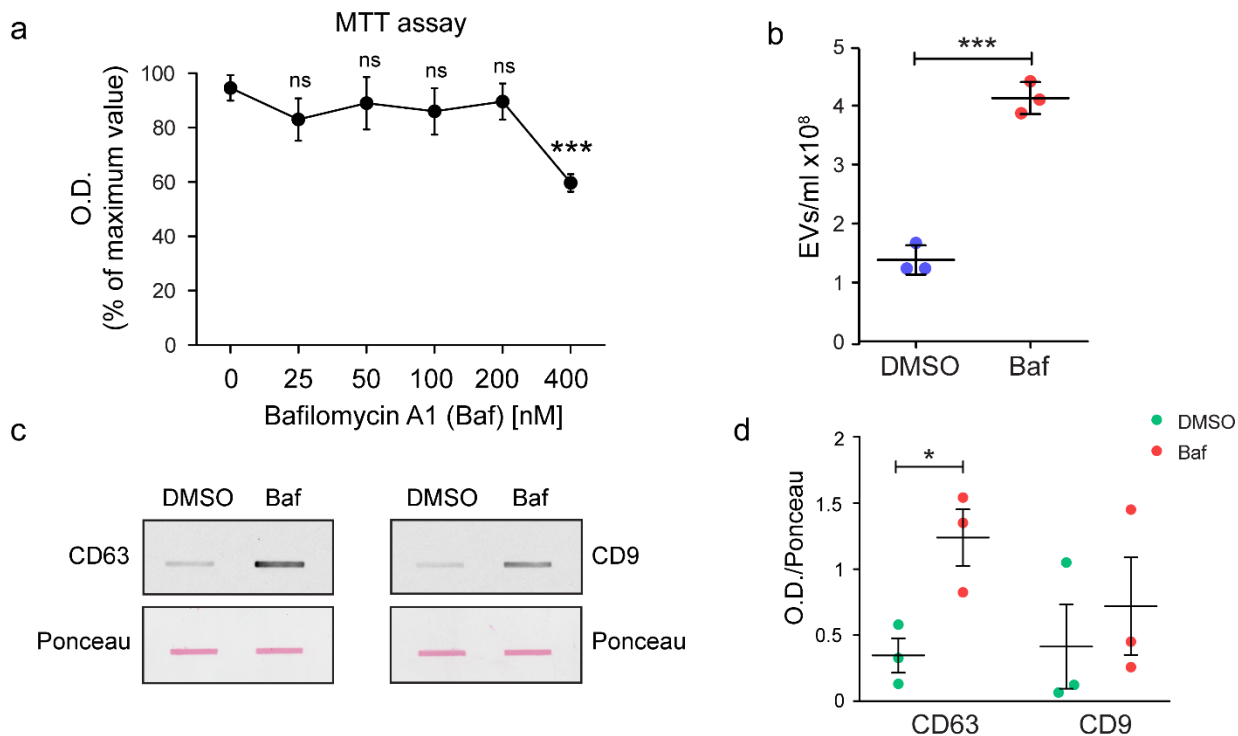

699

700 **Figure S2. Treatment with Bafilomycin A1 increases the number of EVs retrieved from the**  
701 **supernatant.**

702 **a**, Cell viability assay (MTT) was used to define dosages of Bafilomycin A1 (Baf) diluted in Opti-MEM that  
703 do not affect the viability of HeLa cells. HeLa cells were treated with either increasing concentrations of  
704 the drug (25-400 nM) or with the vehicle DMSO (0 nM) for 24 hours. The graph represents the O.D.  
705 values of the MTT metabolite formazan. Bafilomycin A1 did not affect HeLa cell survival at concentrations  
706 < 400 nM. Data were compared using a two-tailed t-test (ns = not significant; \*\*\* p-value of < 0.0001. 0  
707 nM vs. 25 nM: p = 0.0816; 0 nM vs. 50 nM: p = 0.4081; 0 nM vs. 100 nM: p = 0.1985; 0 nM vs. 200 nM:  
708 p = 0.3508). **b**, HeLa cells were cultured in Opti-MEM supplemented with either 50 nM Baf or its solvent,  
709 DMSO, for 24 hours. After centrifuging at 5,000 x g for 10 minutes to discard large debris, the cell  
710 supernatants were analyzed by Nanoparticle Tracking Analysis (NTA) to quantify the number of particles.  
711 The concentration of EVs retrieved from cells treated with Baf ( $1.4 \pm 0.25 \times 10^8$ ; mean  $\pm$  SD) was  
712 significantly increased in comparison to the control ( $4 \pm 0.27 \times 10^8$ ; mean  $\pm$  SD) across three independent  
713 experiments. Slot blots (**c**) and their quantifications (**d**) show that CD63 signal ( $4.44 \pm 1.15$ ; mean  $\pm$  SEM)  
714 increases significantly upon exposure to 50 nM Baf in comparison to CD9 signal ( $2.99 \pm 0.81$ ; mean  $\pm$   
715 SEM). The respective Ponceau images were used to normalize the slot blot signals. Data were compared  
716 using a two-tailed t test where \* p-value < 0.05, \*\* p-value < 0.001, and \*\*\* p-value < 0.0001.

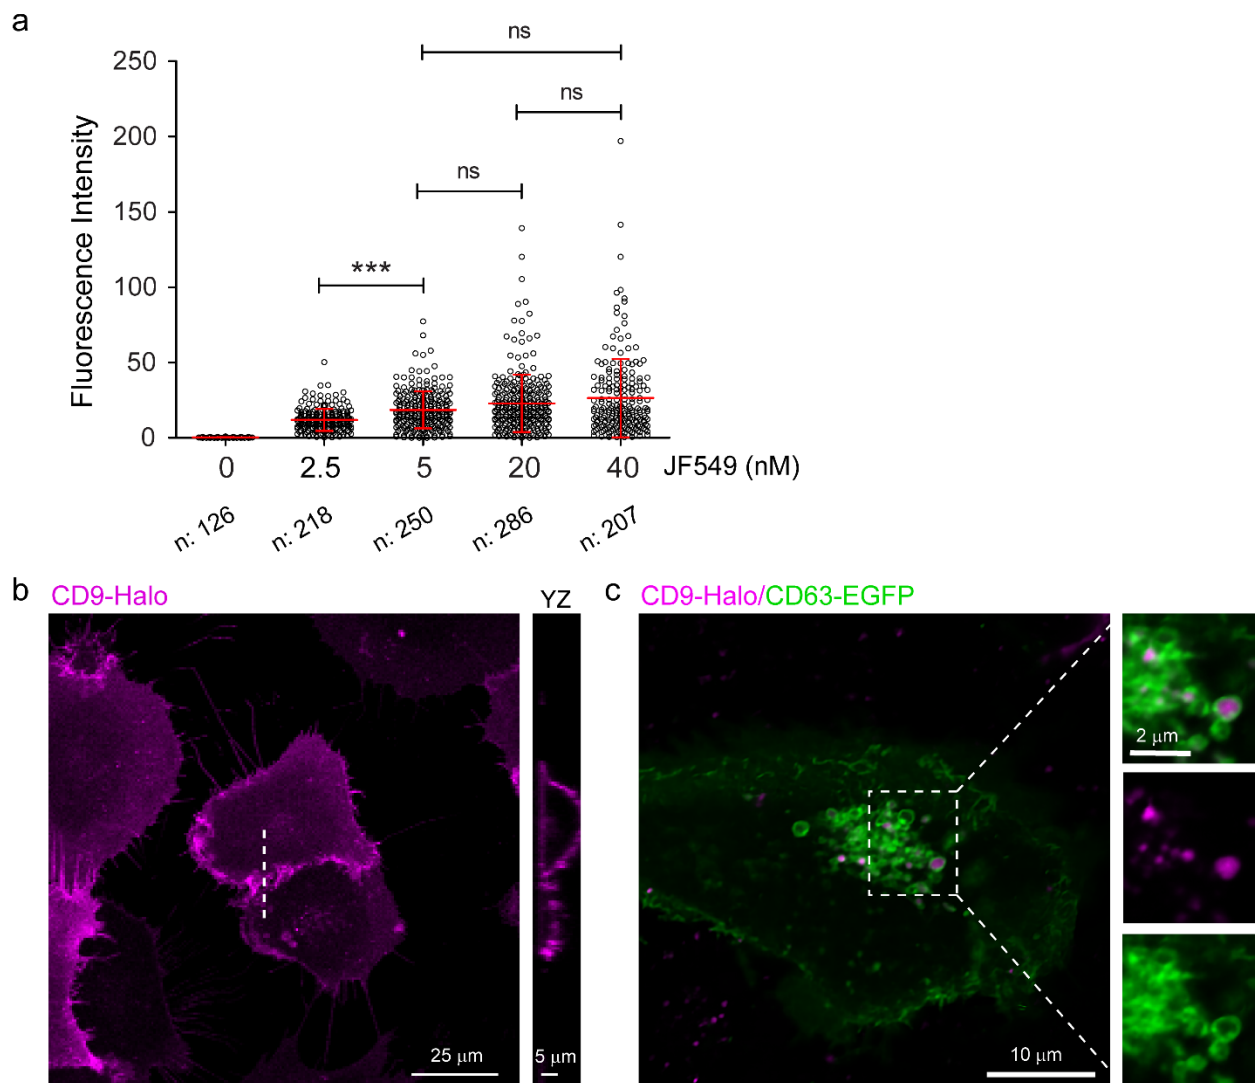

717

718 **Figure S3. CD9-Halo labelling and distribution.**

719 **a**, SUM159 cells stably expressing CD9-Halo were seeded on glass coverslips. Once the cells were  
720 adherent and had returned to their typical morphology, they were stained with increasing concentrations  
721 of JF549 fluorescent ligand (concentrations indicated in the plot) for 1 hour. Next, the cells were washed  
722 in complete media for 2 hours to remove the unbound ligand and subsequently imaged by confocal  
723 microscopy. Hoechst staining was used to label the nuclei. The single-cell fluorescent intensity values  
724 were measured using the Cell Profiler software package. Incubating the cells with 5 nM JF549 ligand  
725 provided a fluorescence intensity that was not significantly different than the ones generated by higher  
726 ligand concentrations, suggesting that treatment with 5 nM is sufficient to saturate CD9-Halo. The number  
727 of cells analyzed per condition are reported as “n” below the x axis. Data were compared using One-way  
728 ANOVA and Tukey’s *post-hoc* test (ns = not significant, \*\*\* p-value < 0.0001). **b**, HeLa CD9-Halo cells  
729 labelled with 5 nM JF549-Halo as previously described were imaged by confocal microscopy (22  
730 consecutive planes over the Z axis spaced 0.5  $\mu$ m apart were acquired). A representative image shows  
731 that CD9-Halo is mainly distributed over the cell surface as was previously demonstrated for CD9-

732 Emerald chimera (see Fig S1d). The white dotted line indicates the plane at which 3D reconstruction  
733 occurred (YZ panel).

734 **c**, HeLa cells expressing CD9-Halo or CD63-EGFP were co-cultured at high density (80% final  
735 confluence) for 24 hours. Next, the cells were treated with 50 nM Bafilomycin A1 for an additional 24  
736 hours, stained with 5 nM JF549 for 1 hour as previously described, and imaged by confocal microscopy  
737 to assess the distribution of CD9<sup>+</sup> EVs in the recipient cells. The majority of CD9<sup>+</sup> ectosomes are enclosed  
738 by CD63-labelled organelles, suggesting that they are engulfed in late endosomes and lysosomes.

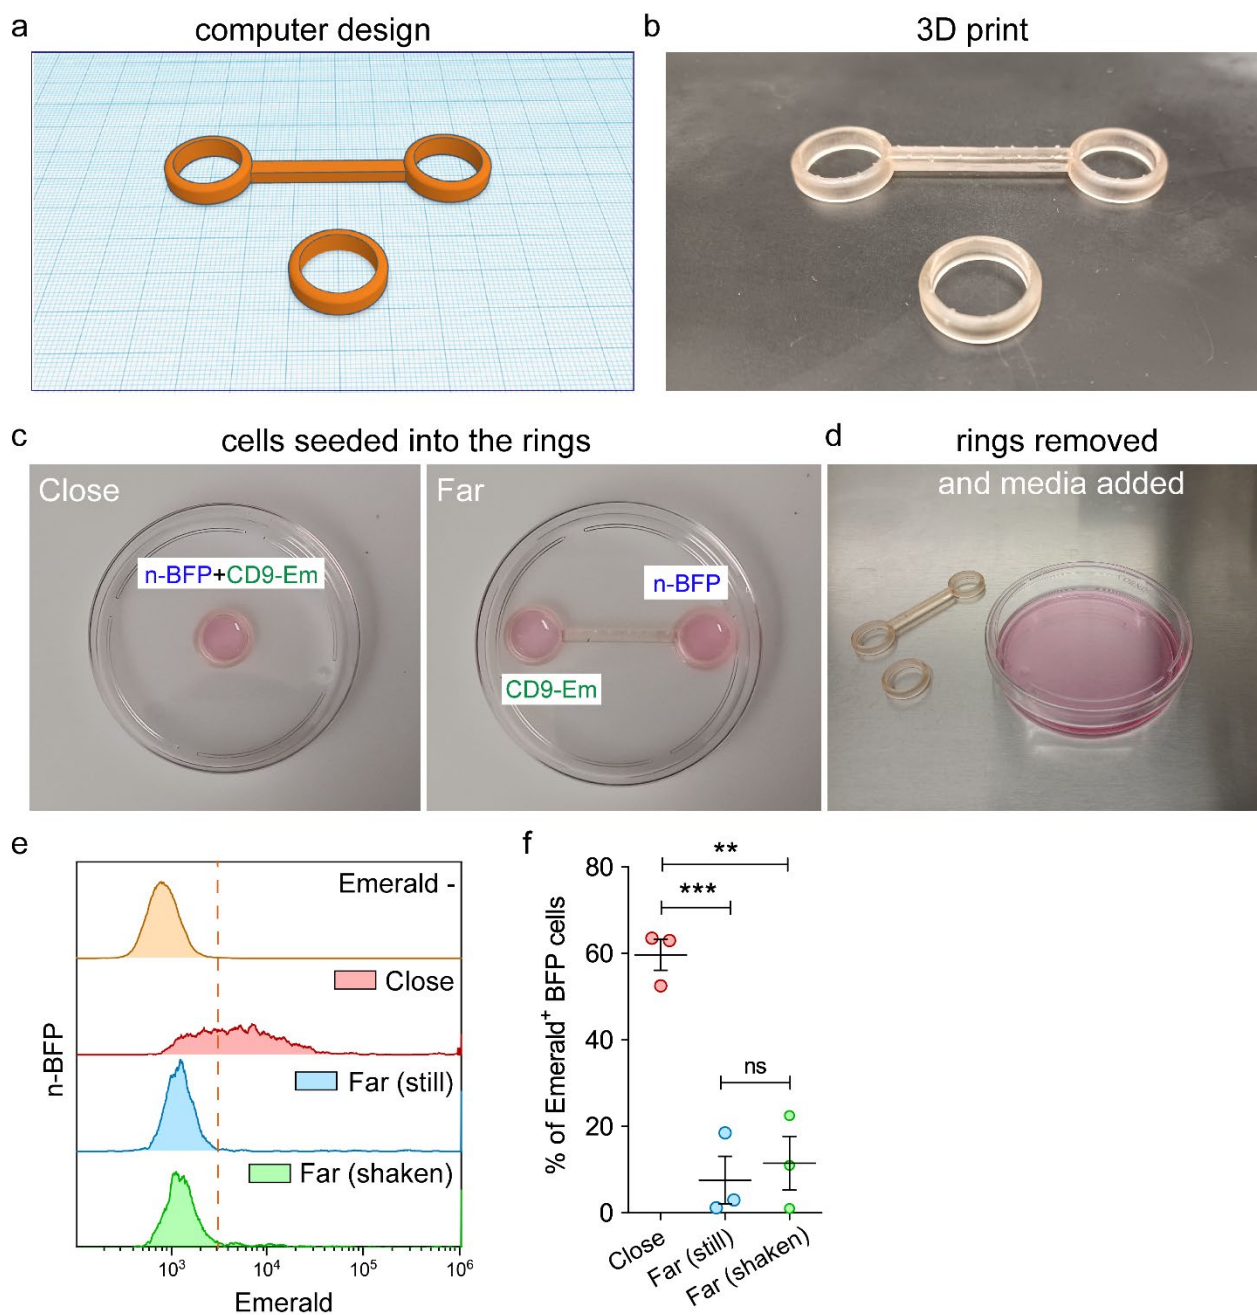

739

740

741

742

743

744

745

746

747

748

749

750

**Figure S4. A compartmentalized co-culture system to study the effect of intercellular distance on EV exchange.**

**a-d**, To define the effect of intercellular distance on the efficiency of EV exchange, we custom designed two co-culture configurations using Tinkercad (Autodesk) software (**a**) and 3D printed those in a biocompatible material (**b**). The “Close configuration” was accomplished by placing the single ring in the middle of a 10 cm petri dish. Both donor and recipient cells were plated together at a 1:1 ratio in this compartment (**c**, Close). In comparison, the “Far configuration” of cell plating was accomplished using two rings connected by a stem of 4 cm in a 10 cm petri dish. Donor and recipient cells were plated in separate rings (**c**, Far) and the stem ensured consistent distance between cells across experimental replicates. 24 hours post-seeding, the rings were removed, and the cells were cultured for an additional 24 hours in media supplemented with 50 nM Bafilomycin A1 (**d**). **e**, To test the contribution of paracellular

751 fluid flow in EV transport, we set up three co-cultures: one was plated in the *Close* configuration as a  
752 control of EV exchange while other two were seeded as *Far* configurations. Of the two *Far* configurations,  
753 one co-culture was placed on an orbital shaker at 37°C to promote media movement and simulate the  
754 flow of extracellular fluid (*Far* (shaken)) while the other remained stationary (*Far* (still)). After 24 hours,  
755 the cells from each condition were detached and analyzed by flow cytometry to measure the percentage  
756 of n-BFP<sup>+</sup>/CD9-Emerald<sup>+</sup> cells. n-BFP<sup>+</sup> cells seeded without donor cells were used as negative controls  
757 to define the minimum value limit for Emerald<sup>+</sup> signal (yellow distribution and red dashed line). The red  
758 distribution accounts for the CD9-Emerald intensities recorded in the n-BFP<sup>+</sup> cell population cultured in  
759 the *Close* configuration, while the blue and the green distributions account for the cells seeded in the *Far*  
760 (still) and *Far* (shaken) configurations respectively. The results from three independent experiments are  
761 reported in **f**. Data were compared using One-way ANOVA and Tukey's *post-hoc* test (ns = not significant;  
762 \*\* p-value < 0.001 and \*\*\* p-value < 0.0001).

763

764 **Movie 1**, A confluent co-culture of SUM159 cells expressing CD9-Halo (magenta) and AP2-EGFP  
765 (green) was imaged by Lattice Light Sheet Microscopy (LLSM). CD9-Halo was stained by incubating the  
766 cells for 1 hour with 5 nM JF549 before imaging. The movie was acquired in sample scan mode and were  
767 composed of sequential volumes that corresponded to 40 slices spaced every 350 nm after de-skewing  
768 (total volume of 73 x 53 x 13 μm). Each slice was exposed to each laser line for 35 ms, resulting in a final  
769 frequency of acquisition of 0.3 Hz. The de-skewed stacks were deconvolved using the Lucy-Richardson  
770 algorithm (MATLAB, MathWorks) and rendered with a multi-dimension viewer developed in MATLAB  
771 environment. The movie is composed of 200 sequential frames mounted at 7 fps. Scale bar is 5 μm. A  
772 slice of the movie is shown in Figure 3a. **Dashed inset**: this shows a magnified area of Movie 1 where a  
773 single EV is transferred from the CD9-Halo donor to the AP2-EGFP recipient cell. The transfer is  
774 completed within the first 24 seconds of the movie. The movie inset is generated at 1 fps and looped, to  
775 improve the visualization of the EV exchange. Scale bar is 2 μm. The frames extrapolated from the inset  
776 are displayed in Figure 3b. **Solid inset**: this magnified area of Movie 1 shows CD9-Halo EVs stalling at  
777 the cell surface of recipient AP2-EGFP cells without been internalized. Puncta of AP2-EGFP,  
778 corresponding to clathrin-coated vesicles (CCVs), repetitively surround the EVs for more than 5 minutes  
779 without completing an effective internalization. Scale bar is 1 μm. Key frames of this inset are displayed  
780 in Figure 3c.

781

782 **Movie 2**, A confluent co-culture of SUM159 cells expressing CD9-Halo (magenta) or AP2-EGFP (green)  
783 imaged by Lattice Light Sheet Microscopy (LLSM). CD9-Halo was stained by incubating the cells for 1  
784 hour with 5 nM JF549 before imaging. The movie was acquired in sample scan mode and was composed  
785 of sequential volumes that corresponded to 40 slices spaced every 350 nm after de-skewing (total volume  
786 of 73 x 53 x 13 μm). Each slice was exposed to each laser line for 35 ms, resulting in a final frequency of  
787 acquisition of 0.3 Hz. The de-skewed stacks were deconvolved using the Lucy-Richardson algorithm

788 (MATLAB, MathWorks) and rendered with a multi-dimension viewer developed in MATLAB environment.  
789 The movie is composed of 200 sequential frames mounted at 7 fps. Scale bar is 5  $\mu\text{m}$ . A slice of the  
790 movie is shown in Figure 3d. **Dashed inset:** this shows a magnified area of Movie 2 where a single EV  
791 is transferred from the CD9-Halo donor to the AP2-EGFP recipient cell. The movie is composed of 200  
792 sequential frames. Scale bar is 2  $\mu\text{m}$ . Key frames of the movie are displayed in Figure 3e.

793

794 **Movie 3,** A confluent co-culture of SUM159 cells expressing CD9-Halo (magenta) or AP2-EGFP (green)  
795 imaged by Lattice Light Sheet Microscopy (LLSM). CD9-Halo was stained by incubating the cells for 1  
796 hour with 5 nM JF549 before imaging. The movies were acquired in sample scan mode and were  
797 composed of sequential volumes that corresponded to 40 slices spaced every 350 nm after de-skewing  
798 (total volume of 73 x 53 x 13  $\mu\text{m}$ ). Each slice was exposed to each laser line for 35 ms, resulting in a final  
799 frequency of acquisition of 0.3 Hz. The de-skewed stacks were deconvolved using the Lucy-Richardson  
800 algorithm (MATLAB, MathWorks) and rendered with a multi-dimension viewer developed in MATLAB  
801 environment. The movies shown are composed of 133 and 177 sequential frames respectively mounted  
802 at 7 fps. Scale bar is 4  $\mu\text{m}$ . The white arrows indicate filopodia of CD9-Halo cells that fragmented in the  
803 extracellular space into EVs.
